# Supplementary material
Source: PubMed Central journal article supplement (PMC6271133)

# Supporting Information

## General Procedures

$^1\text{H}$ -NMR and  $^{13}\text{C}$ -NMR spectra were recorded on a Varian NMR spectrometers operating at 300 MHz or 500 MHz for  $^1\text{H}$ , and 75 MHz or 125 MHz for  $^{13}\text{C}$ . All chemical shifts were measured in  $\text{CDCl}_3$  and  $\text{DMSO-d}_6$  as solvents. High resolution mass spectroscopic data were acquired on an Agilent 6220 ESI-TOF with electro spray ionization (ESI) mode.

**Figure S1.**  $^1\text{H}$ -NMR of compound **12a**.

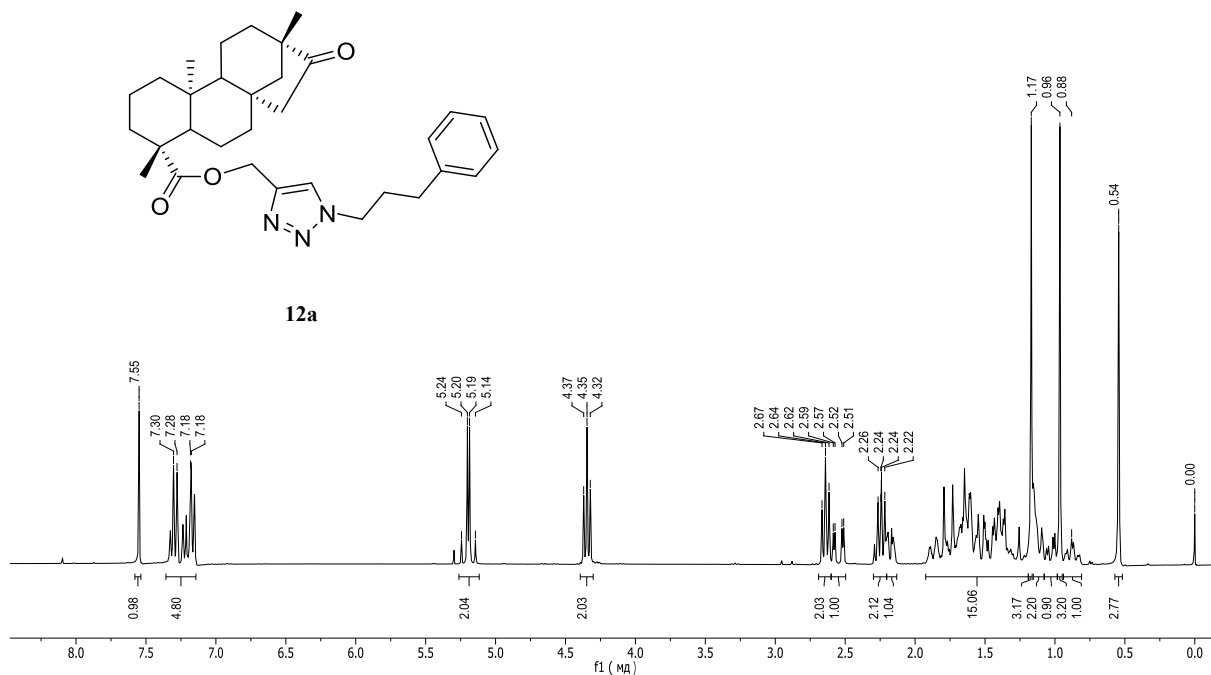

Figure S2.  $^{13}\text{C}$ -NMR of compound 12a.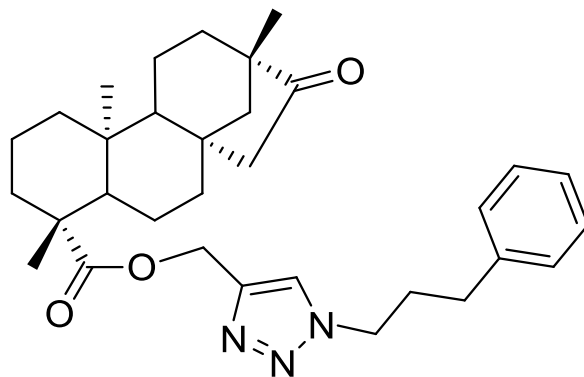

12a

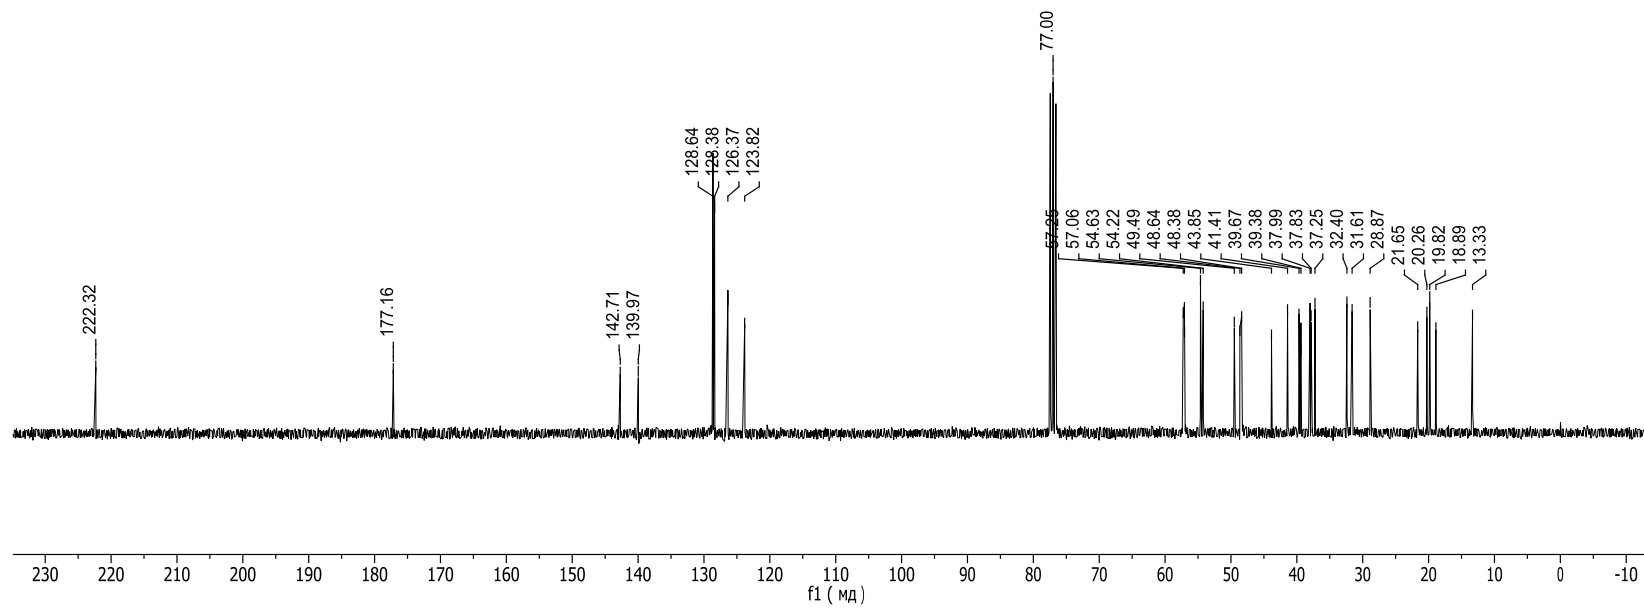

Figure S3. HRMS of compound 12a.

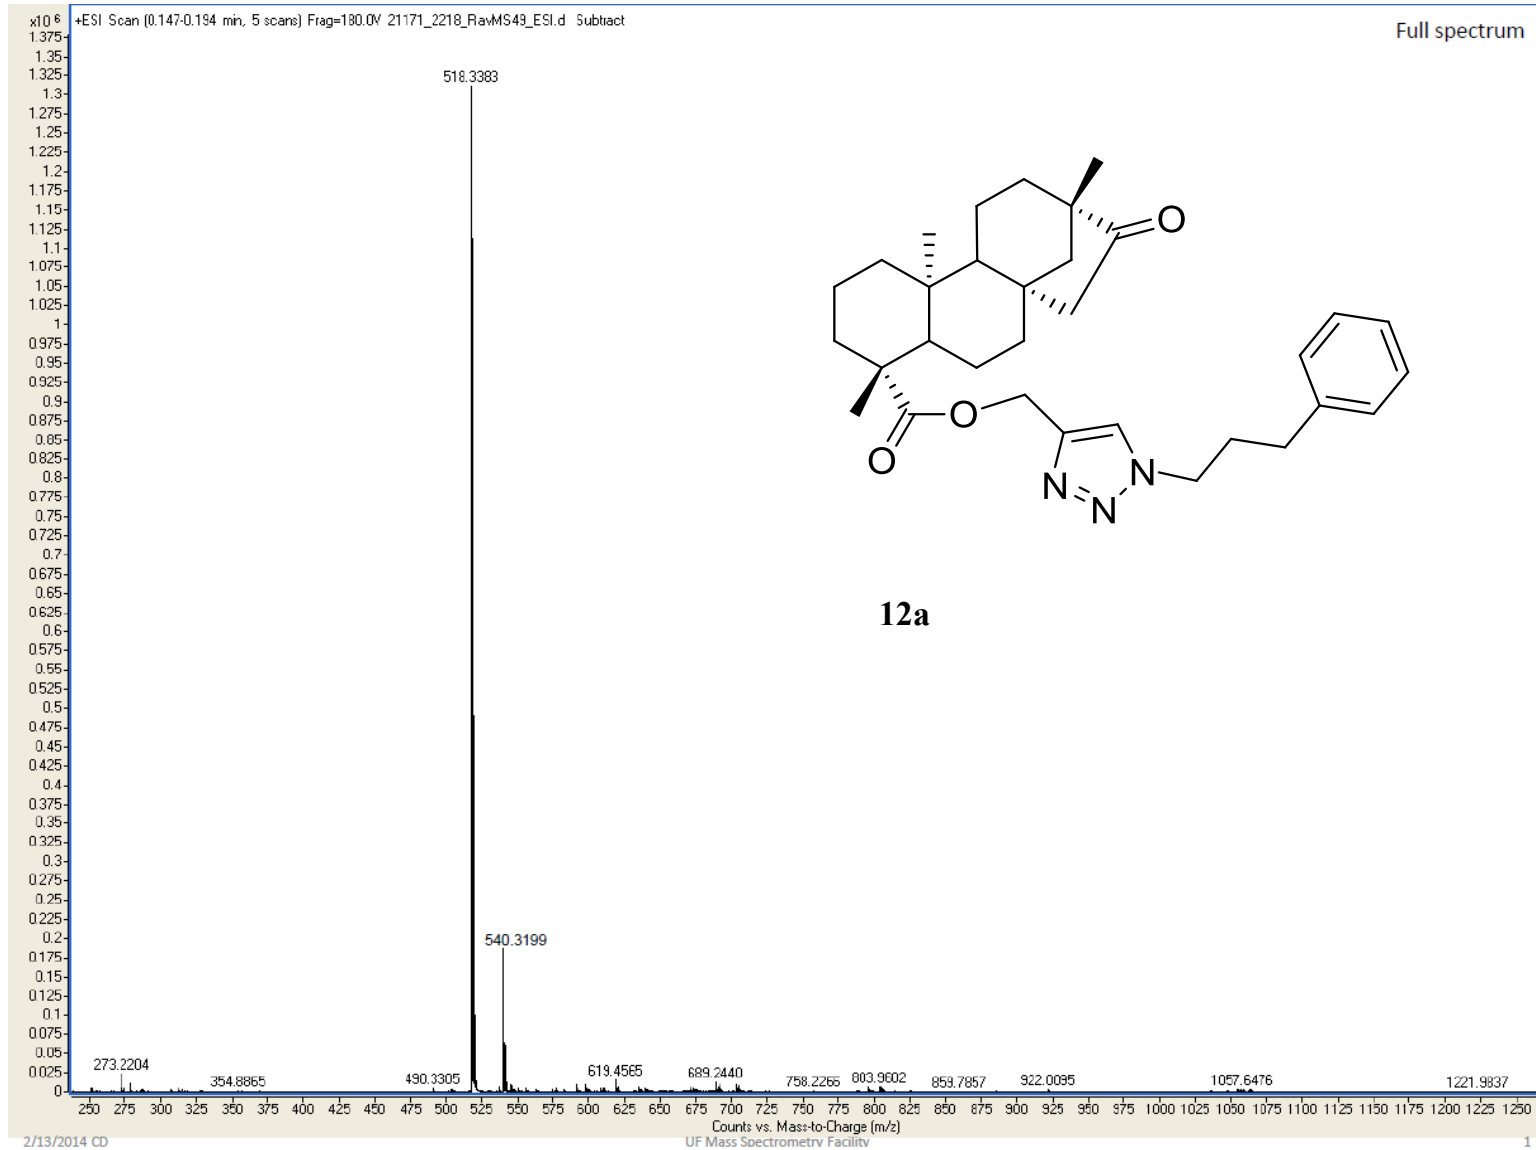

Figure S4. <sup>1</sup>H-NMR of compound 12b.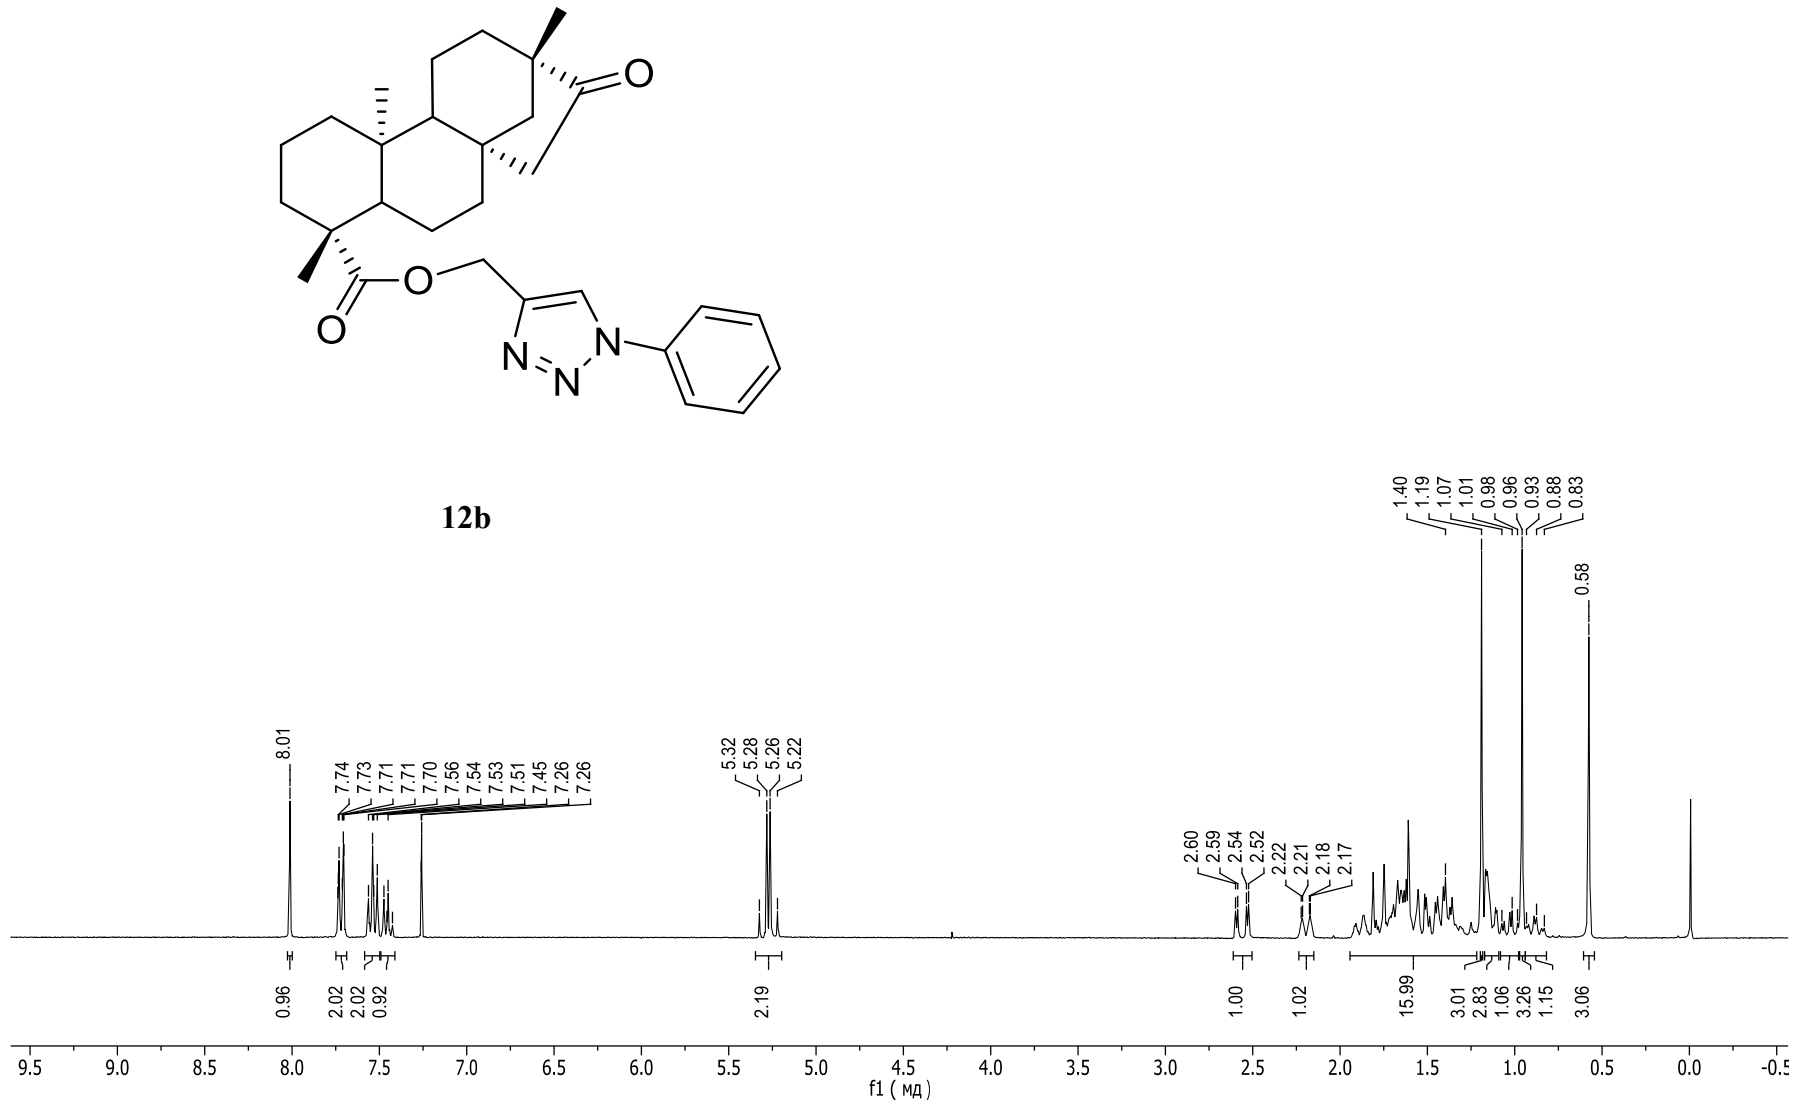

Figure S5.  $^{13}\text{C}$ -NMR of compound 12b.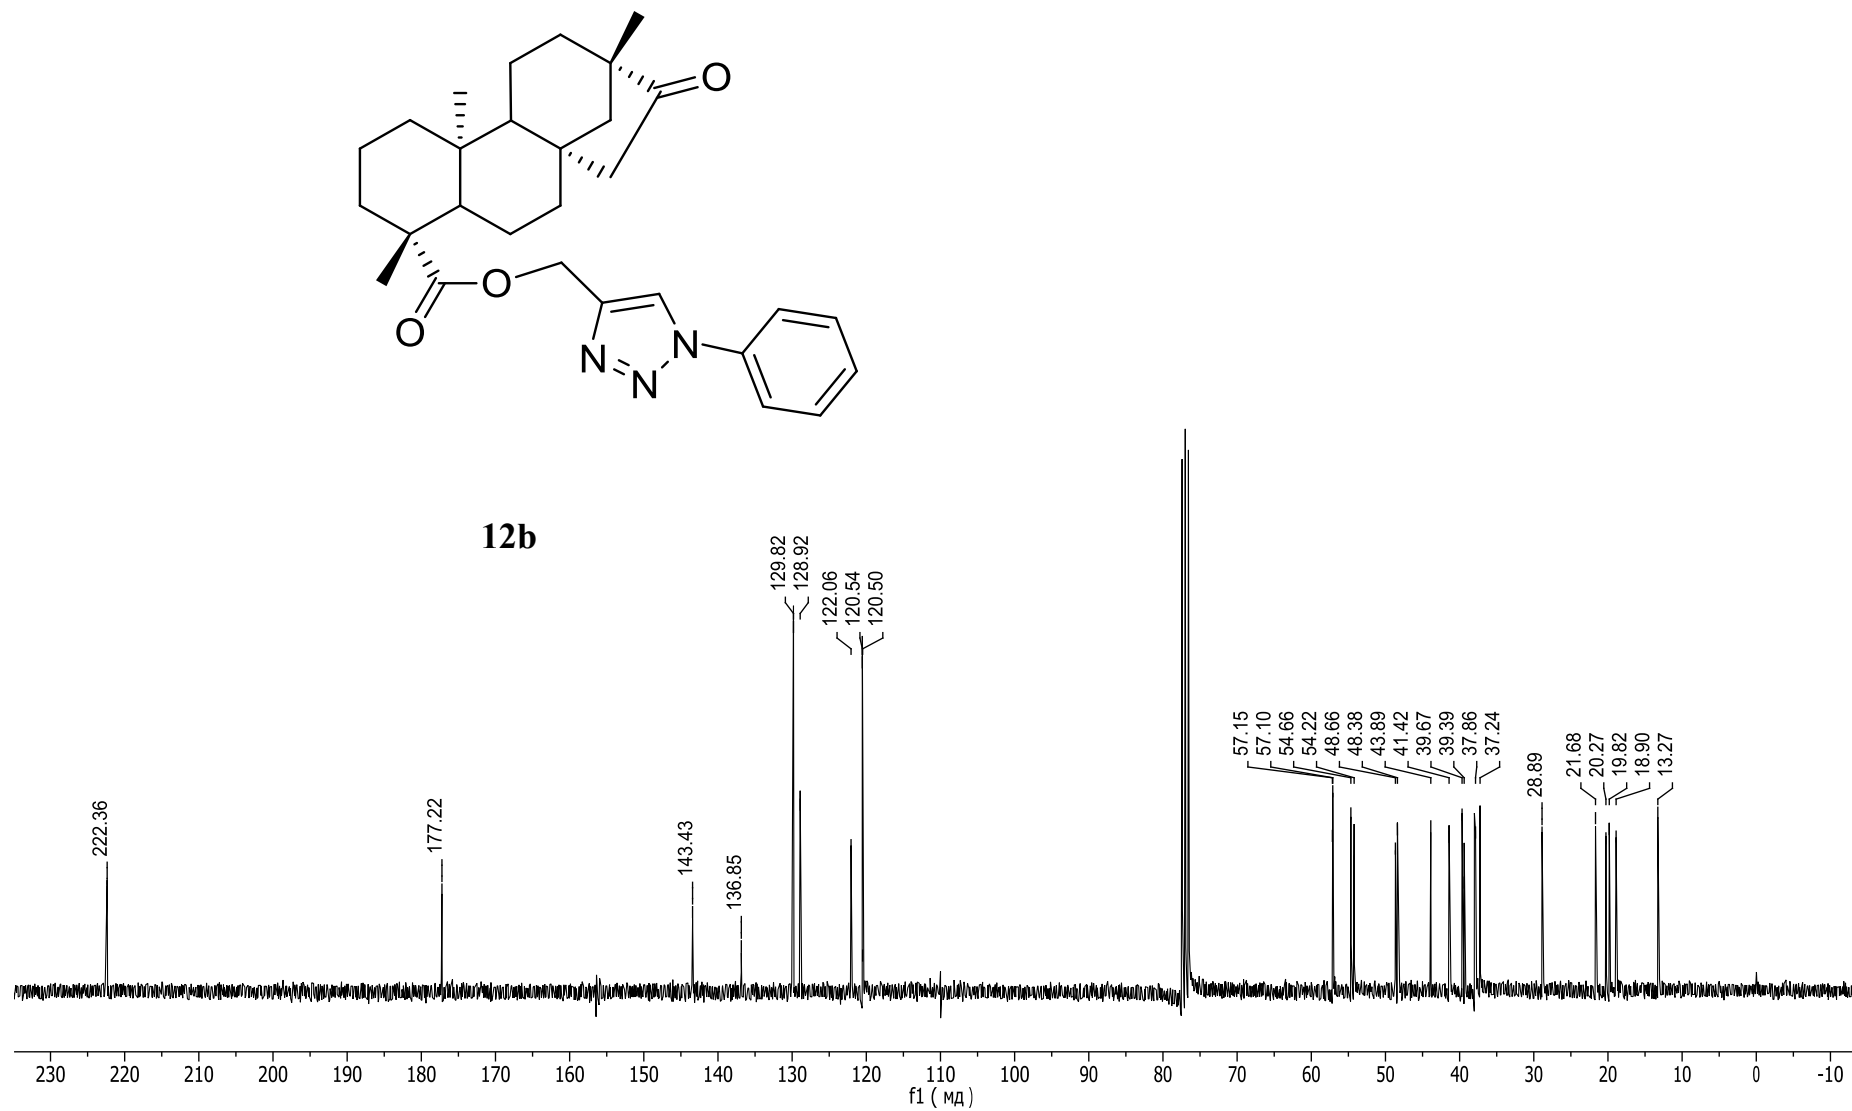

Figure S6. HRMS of compound 12b.

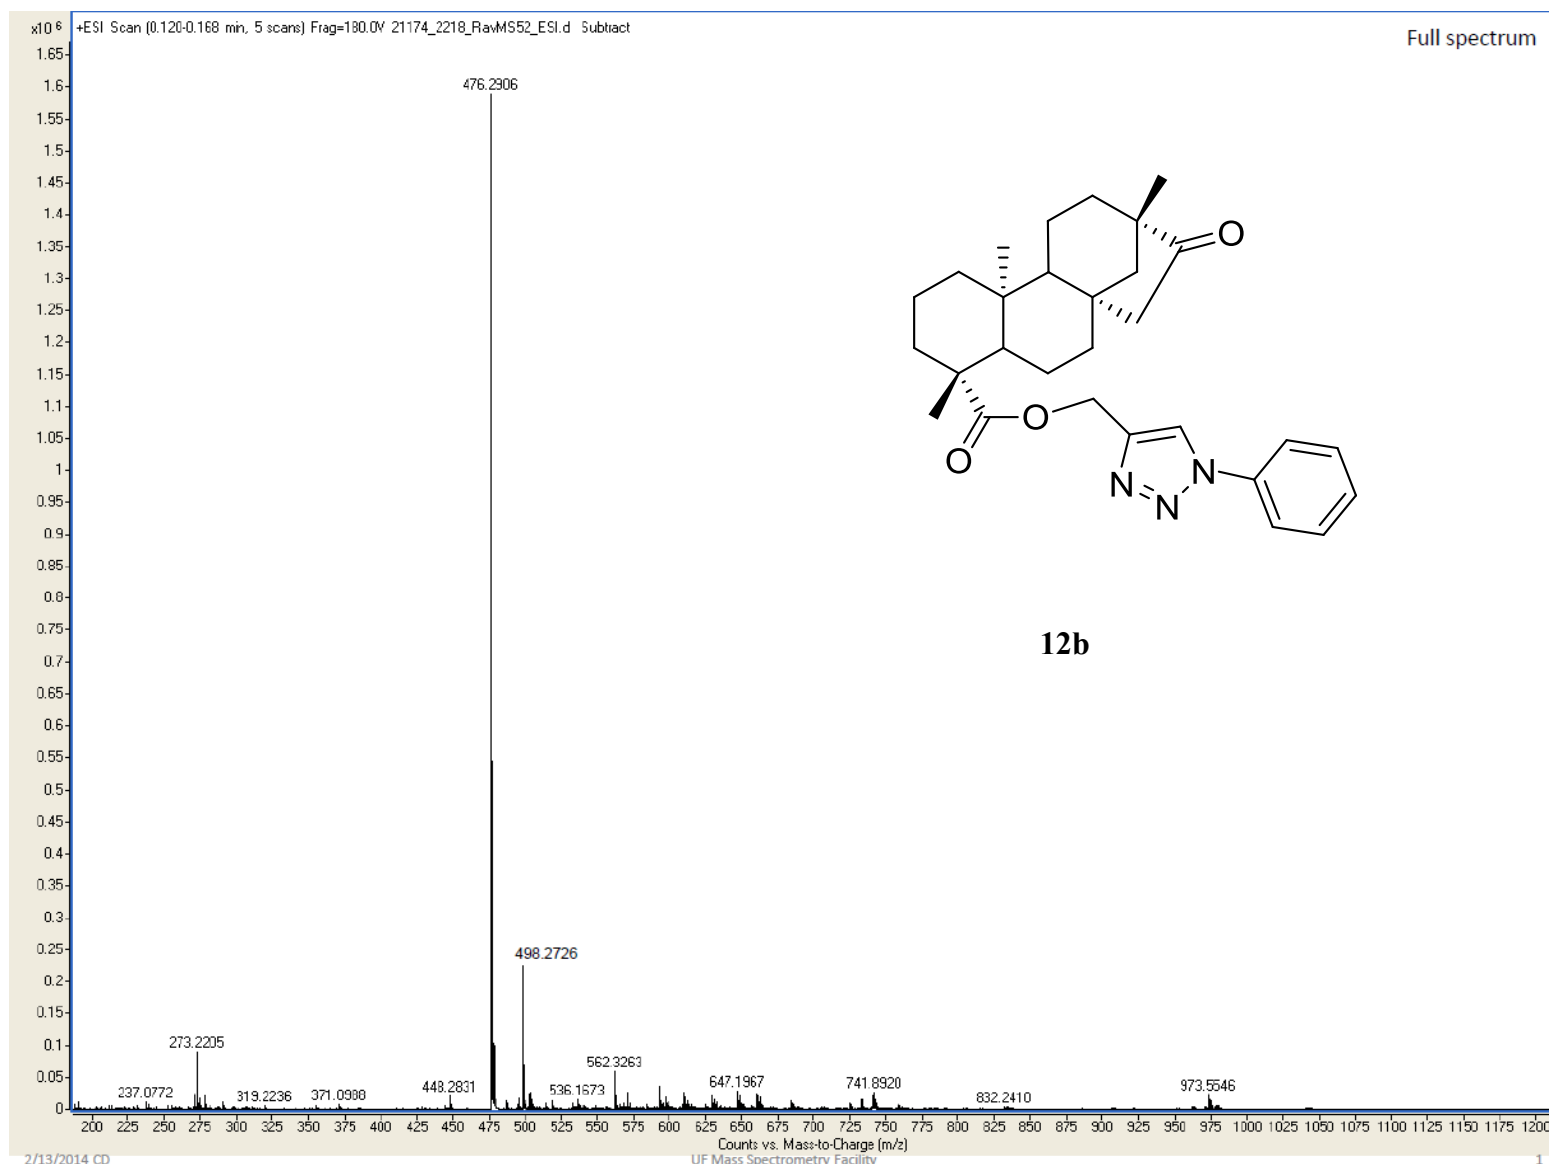

Figure S7.  $^1\text{H-NMR}$  of compound **12c**.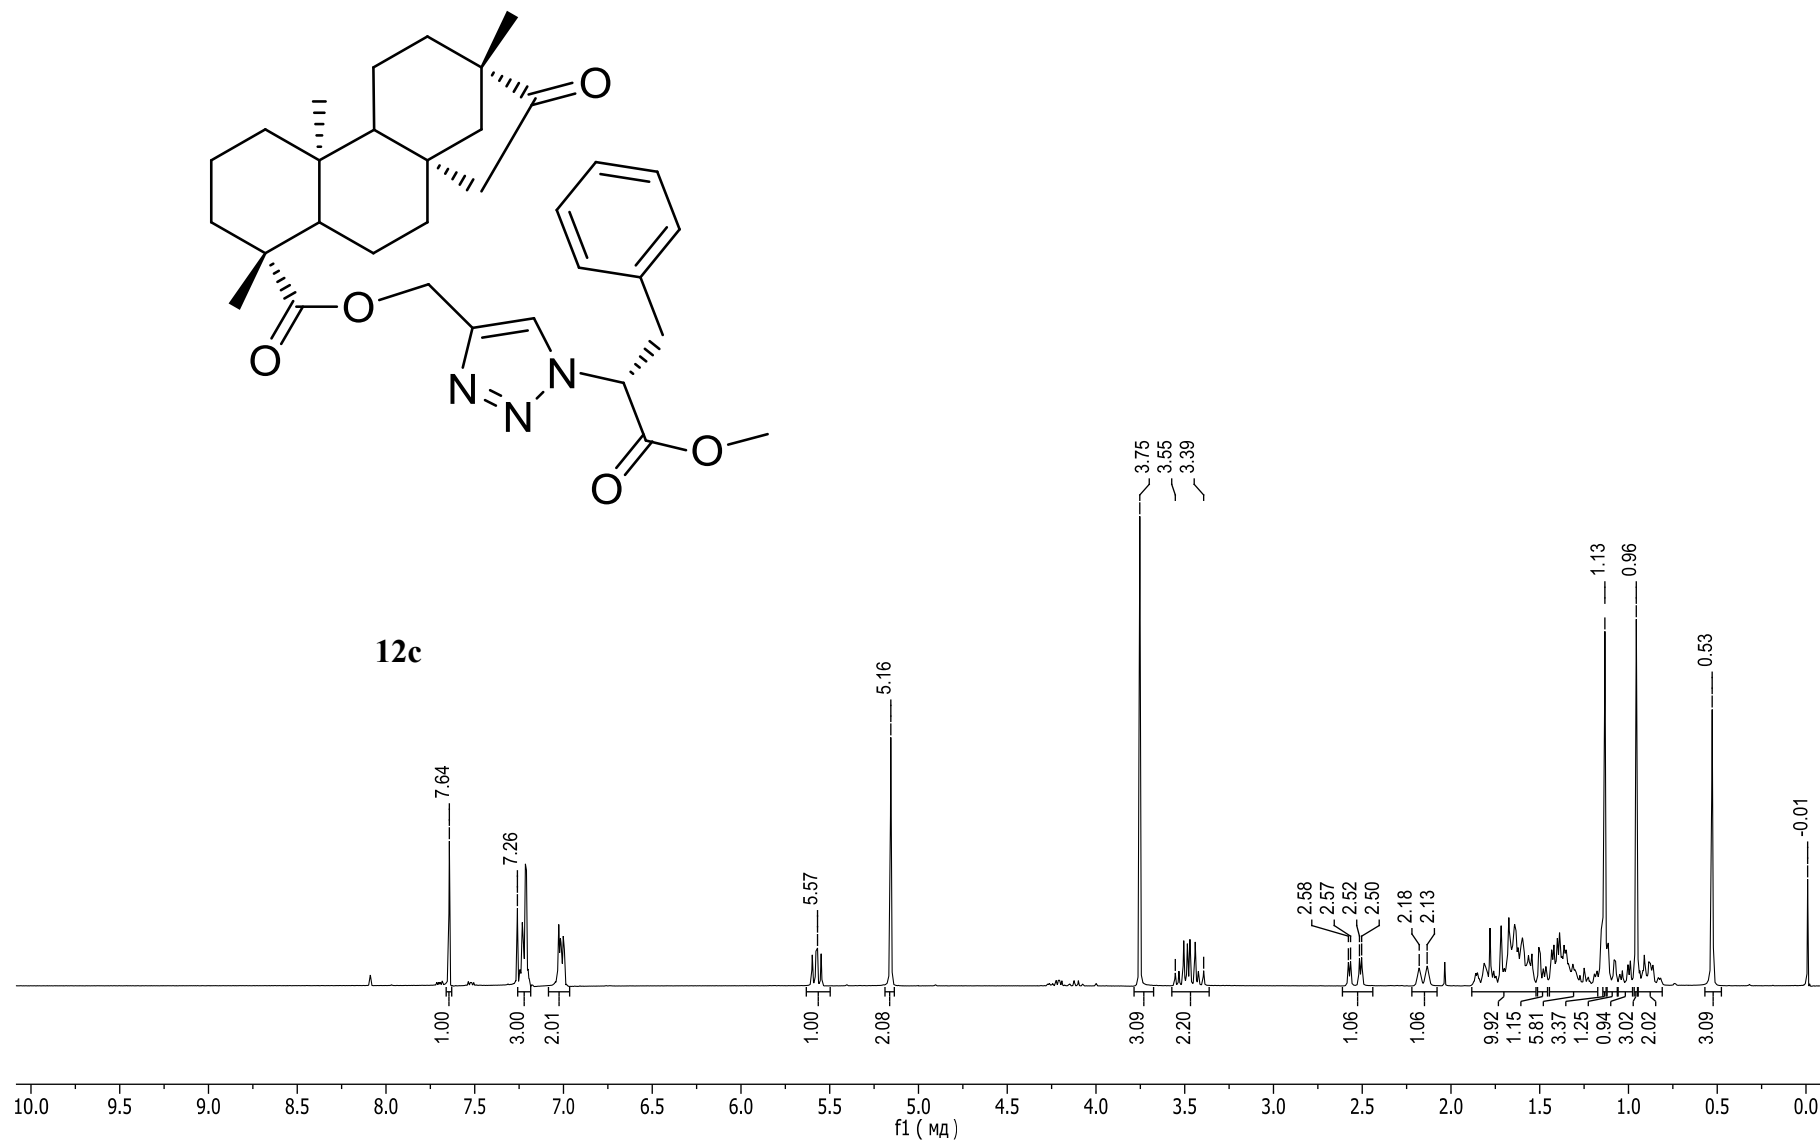

Figure S8.  $^{13}\text{C}$ -NMR of compound 12c.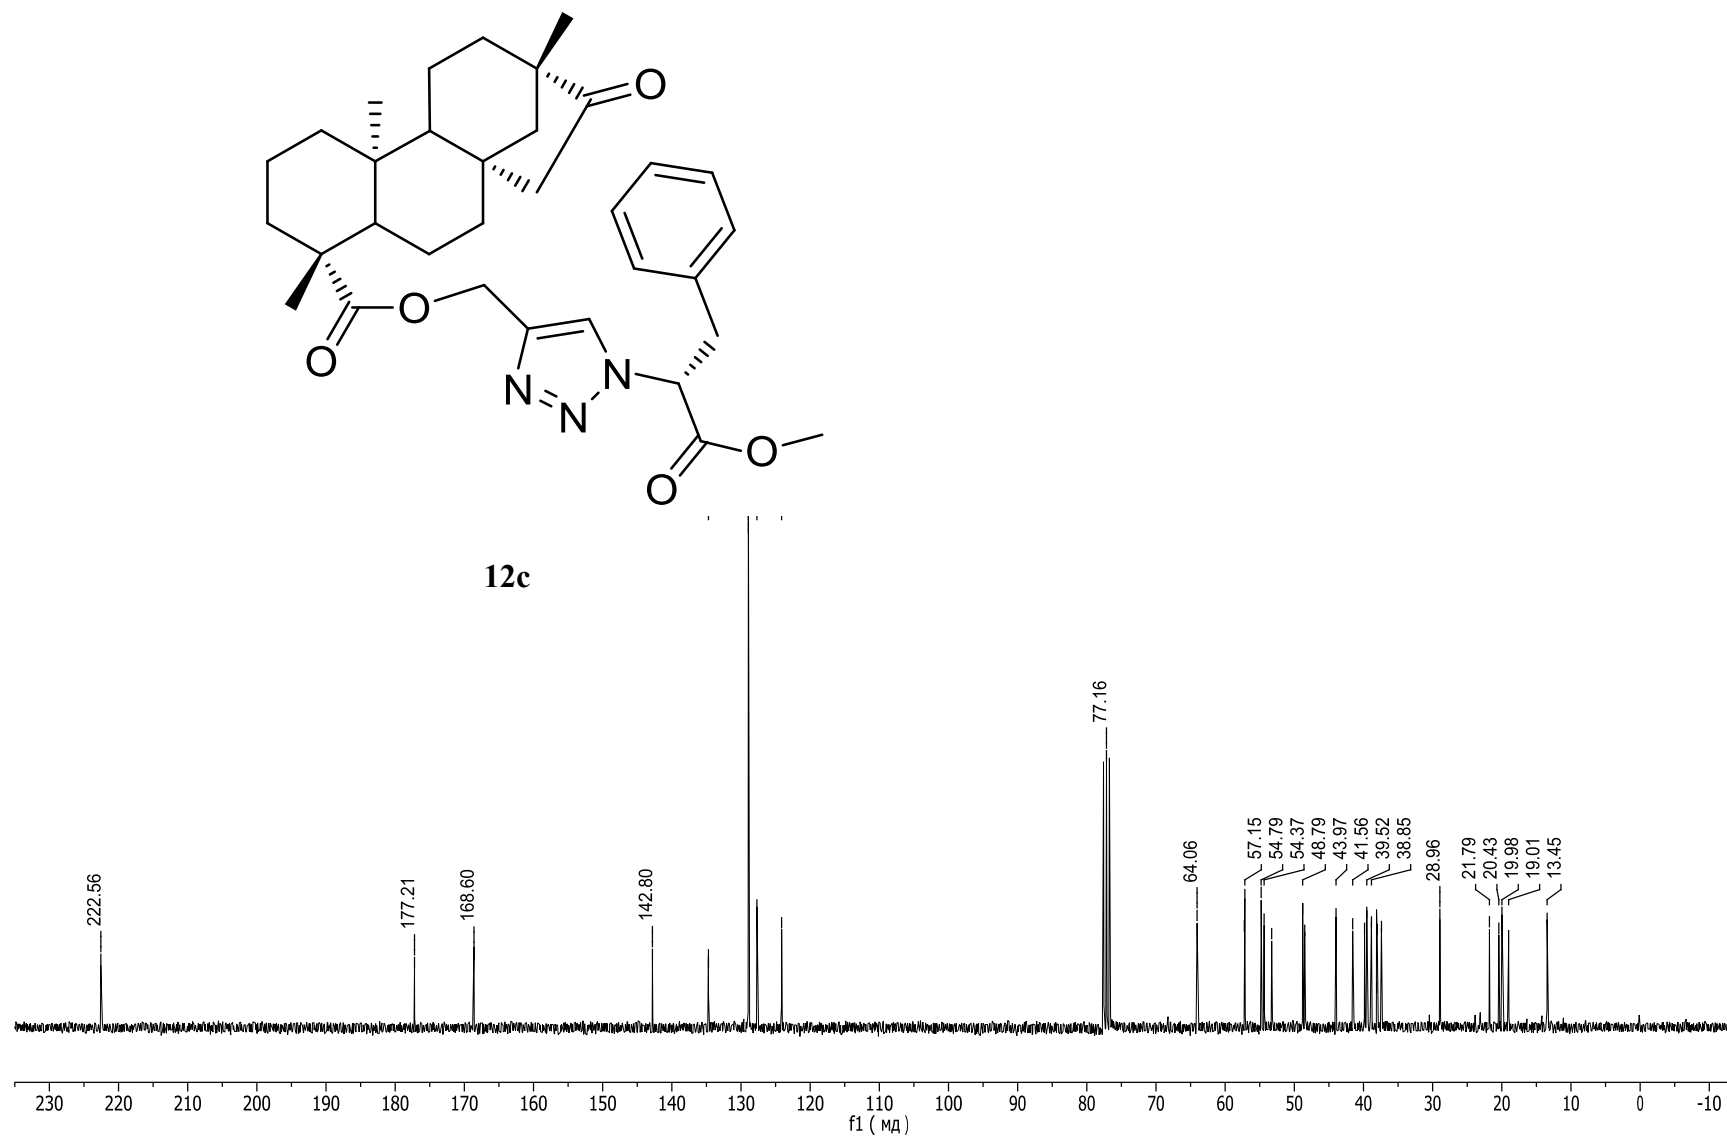



Figure S9. HRMS of compound 12c.

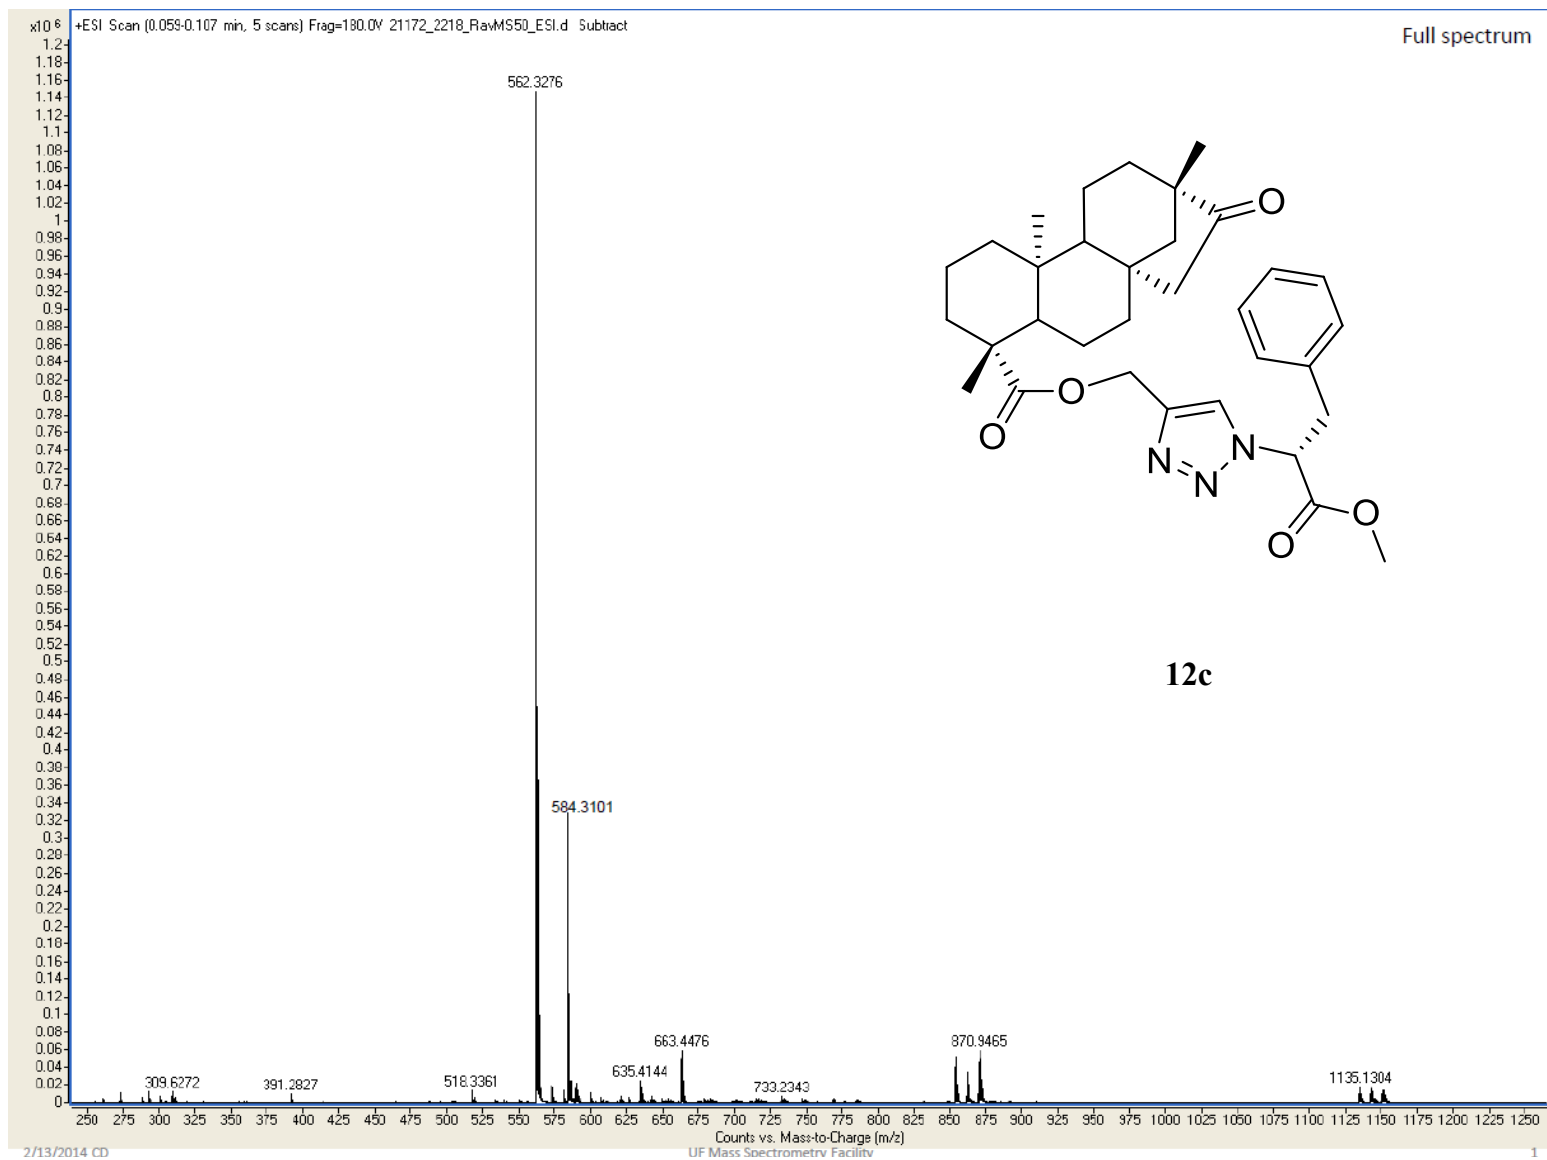

Figure S10.  $^1\text{H-NMR}$  of compound **12d**.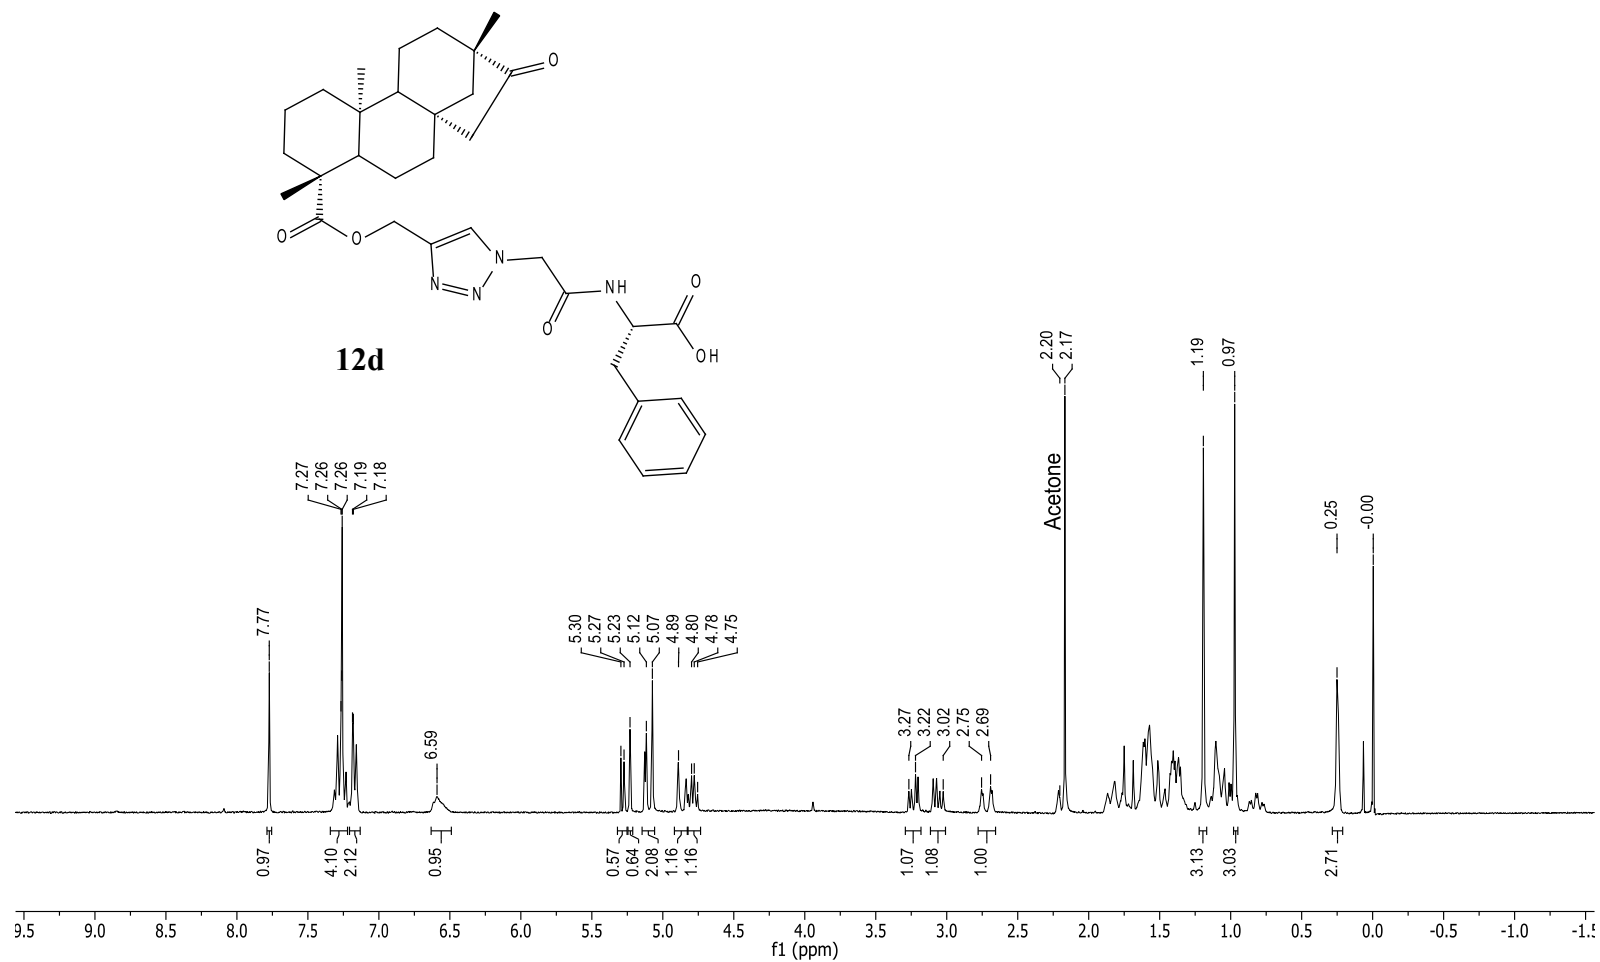

Figure S11.  $^{13}\text{C}$ -NMR of compound **12d**.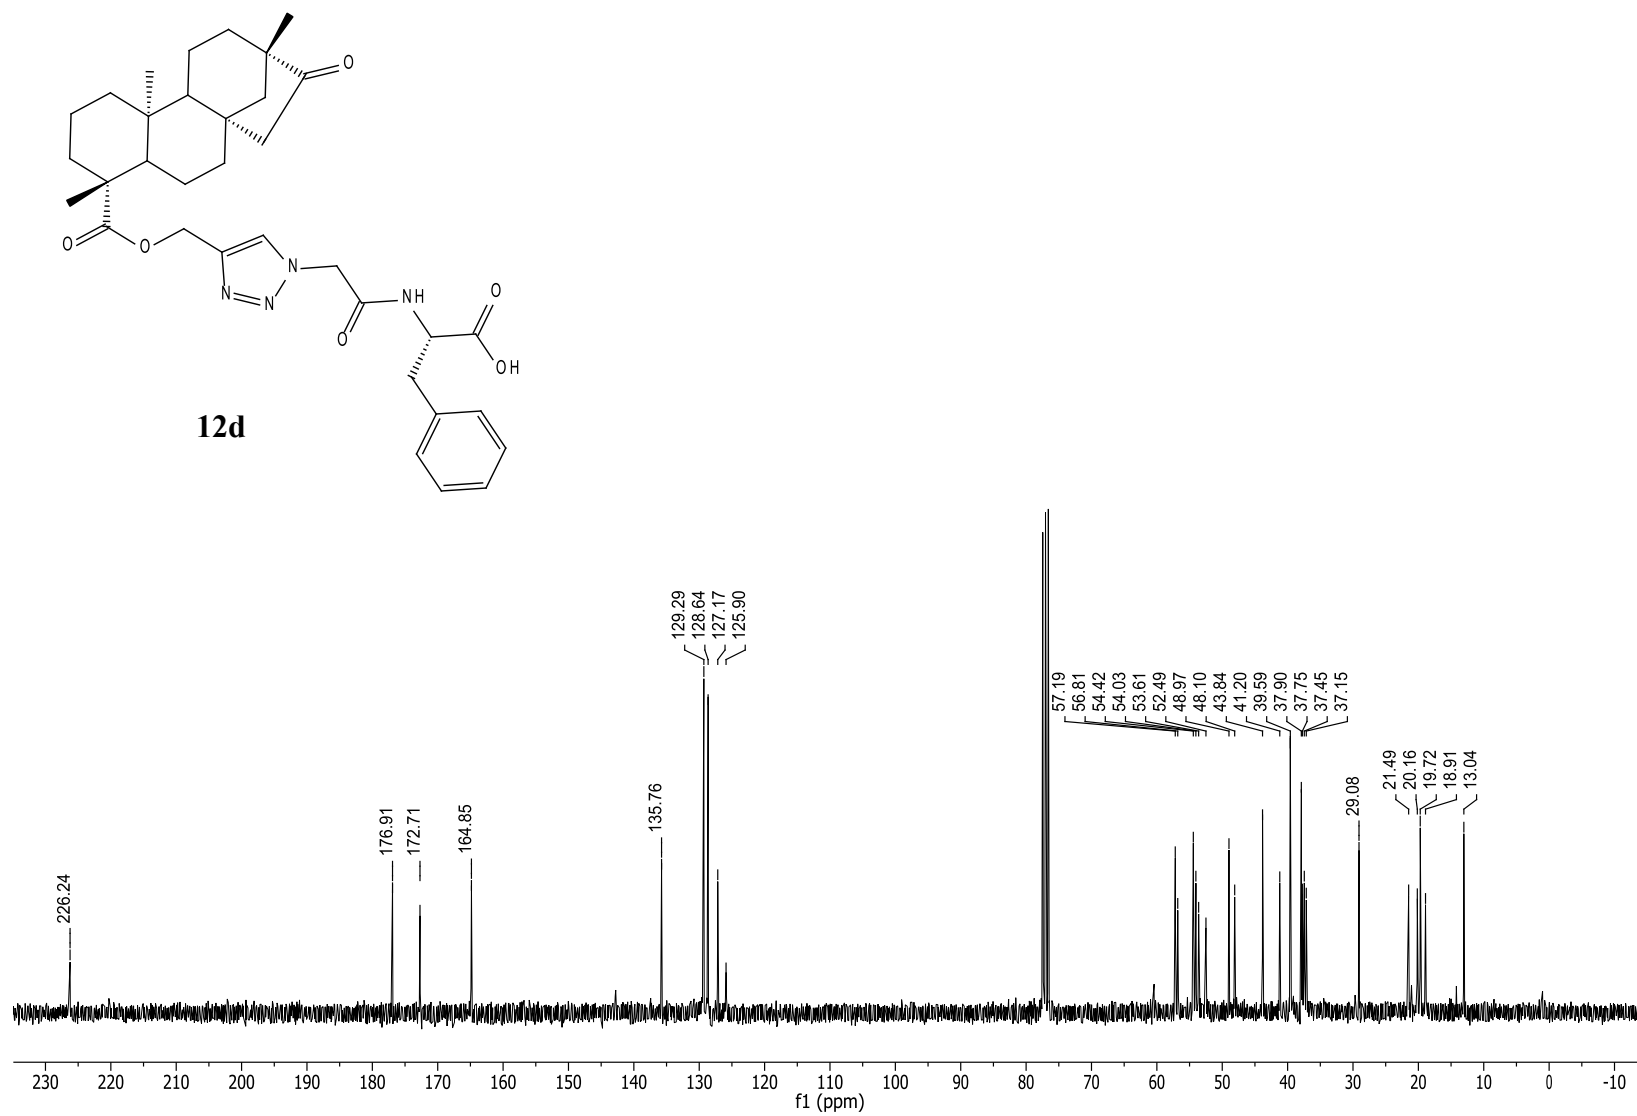

Figure S12. HRMS of compound 12d.

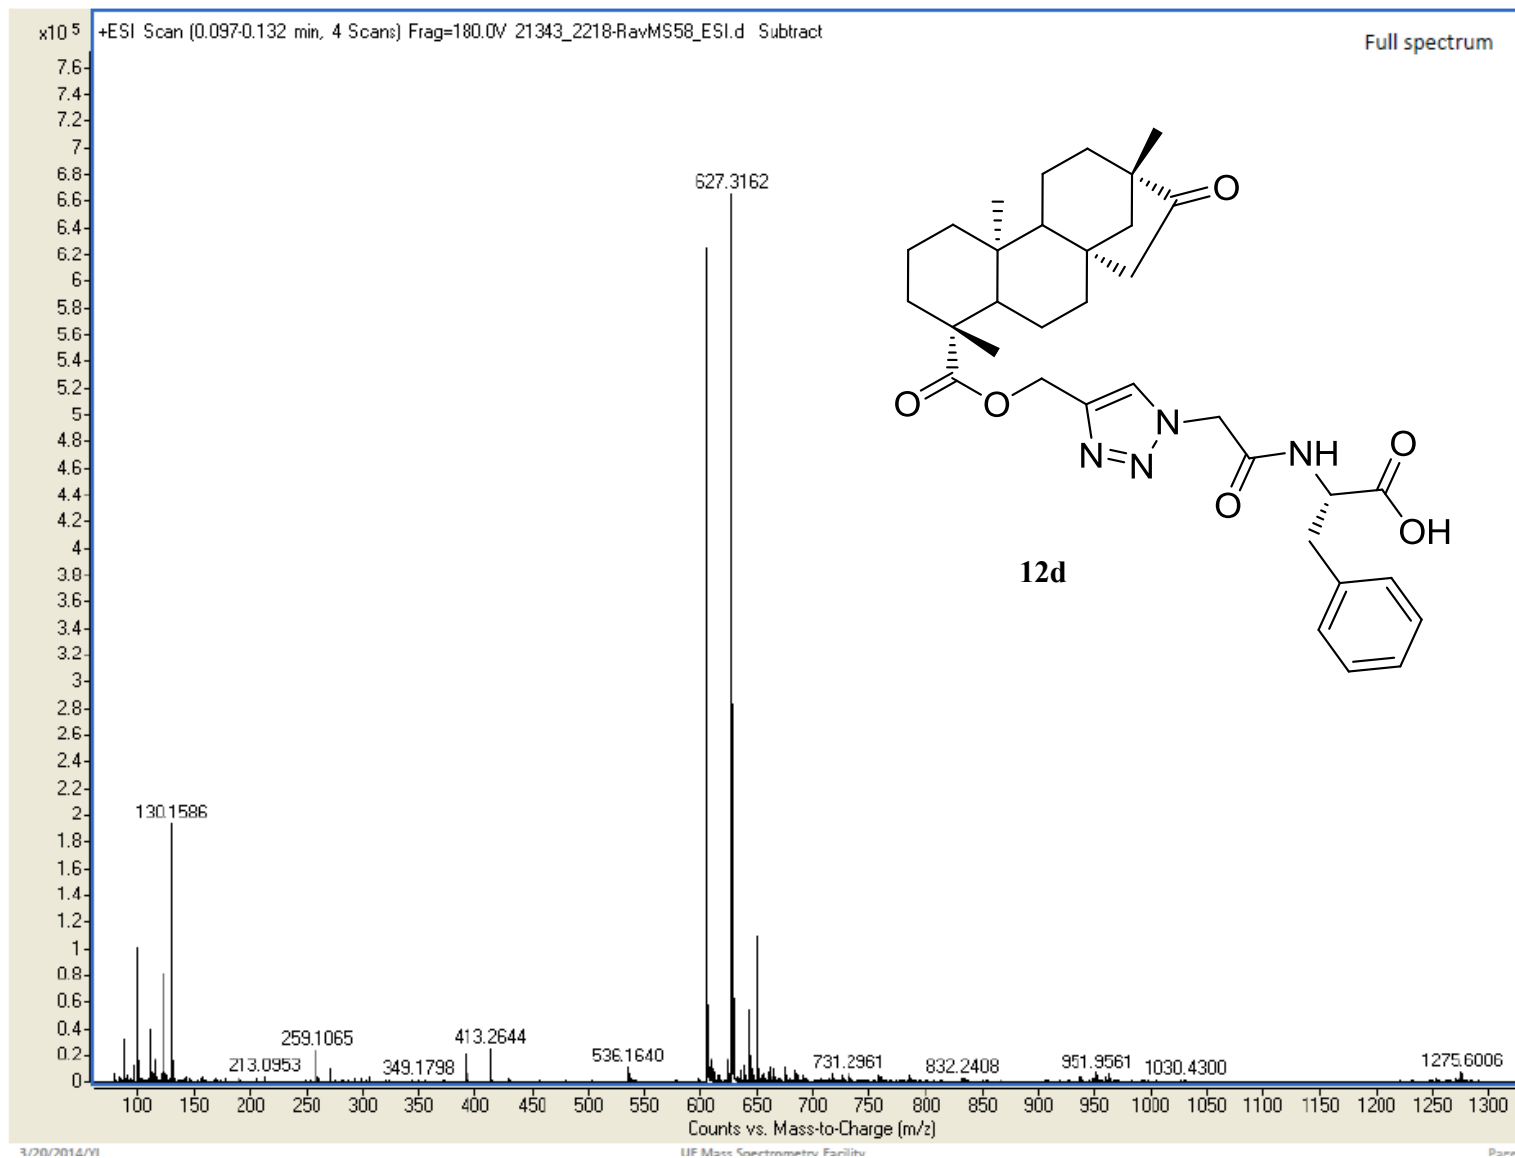

Figure S13.  $^1\text{H-NMR}$  of compound **13a**.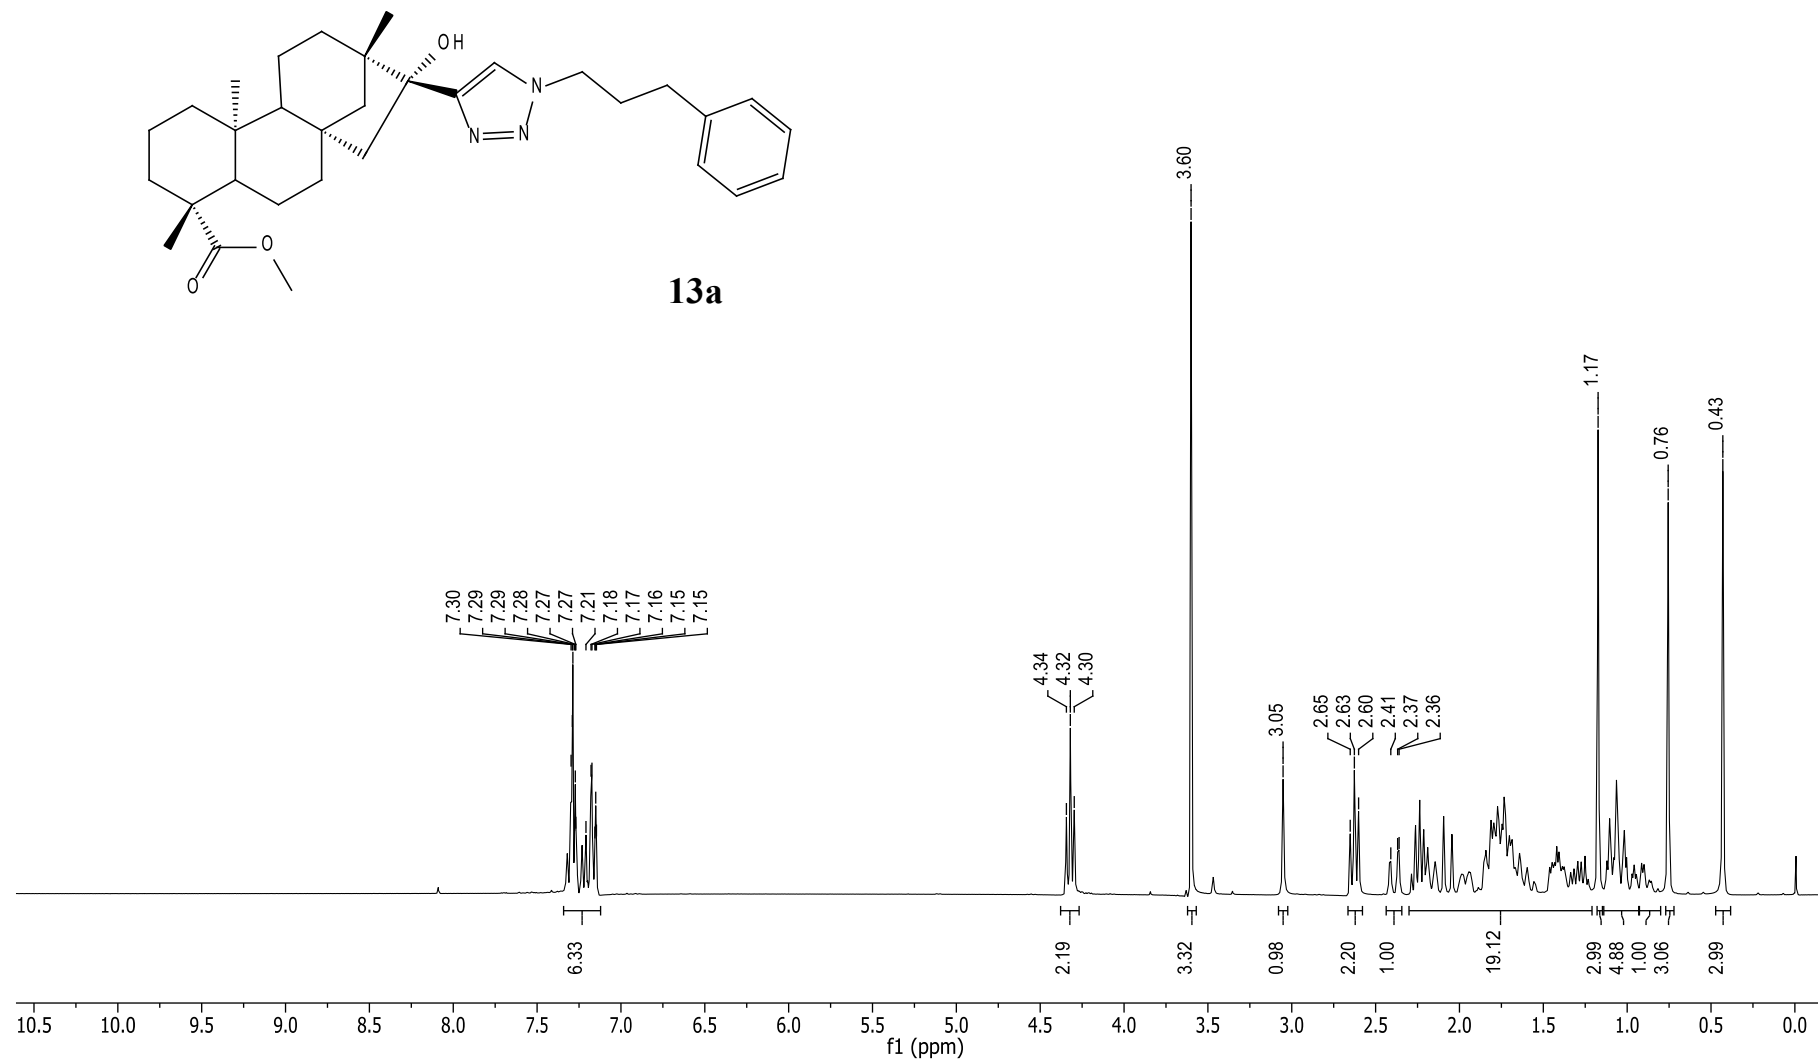

Figure S14.  $^{13}\text{C}$ -NMR of compound **13a**.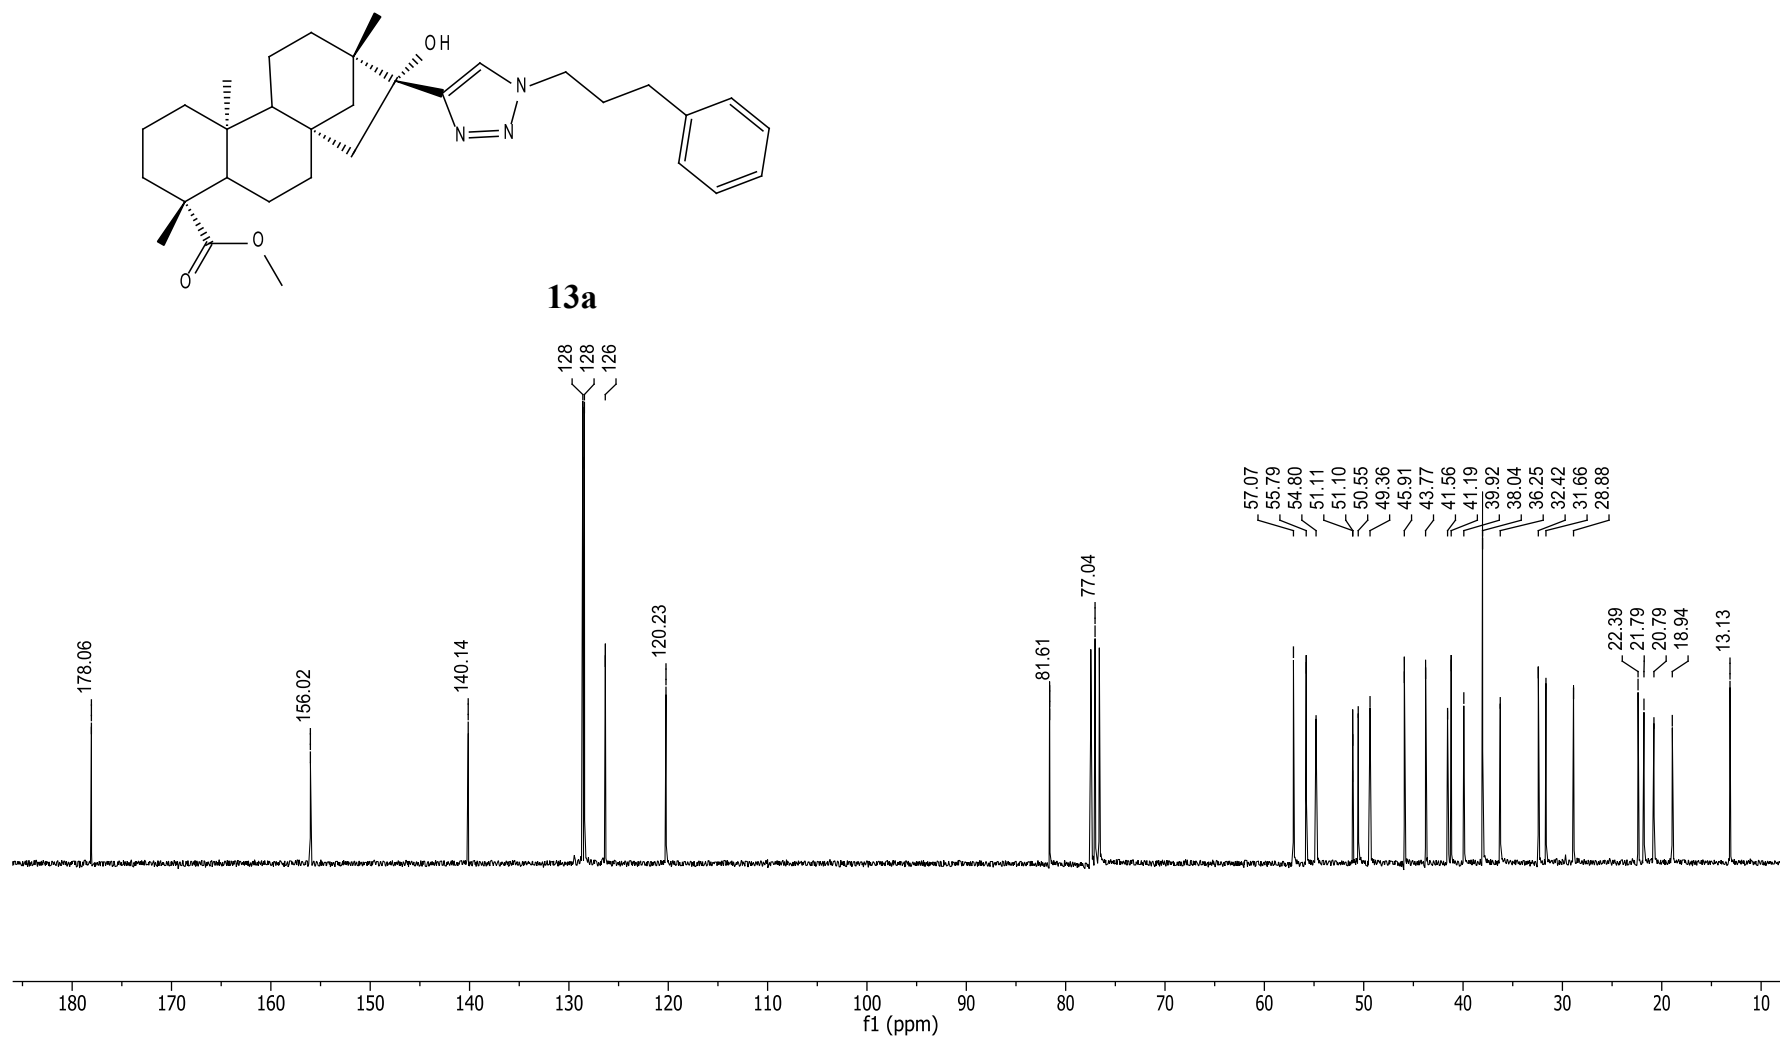

Figure S15. HRMS of compound 13a.

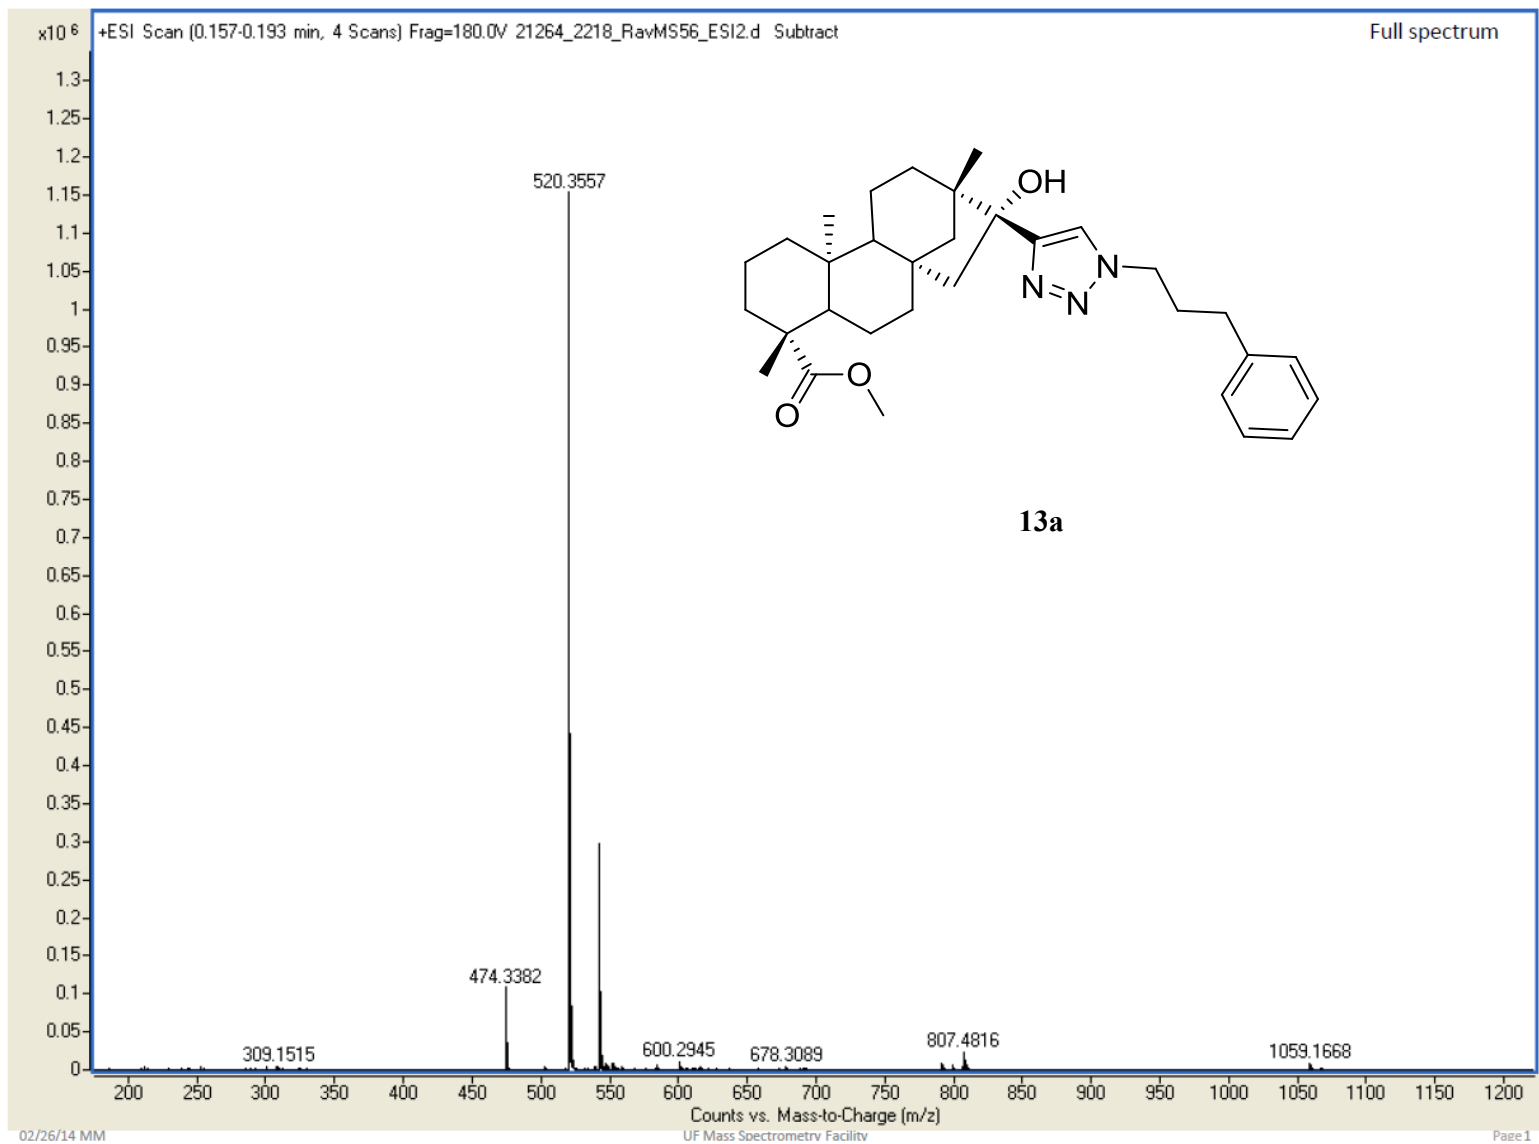

Figure S16.  $^1\text{H-NMR}$  of compound **13b**.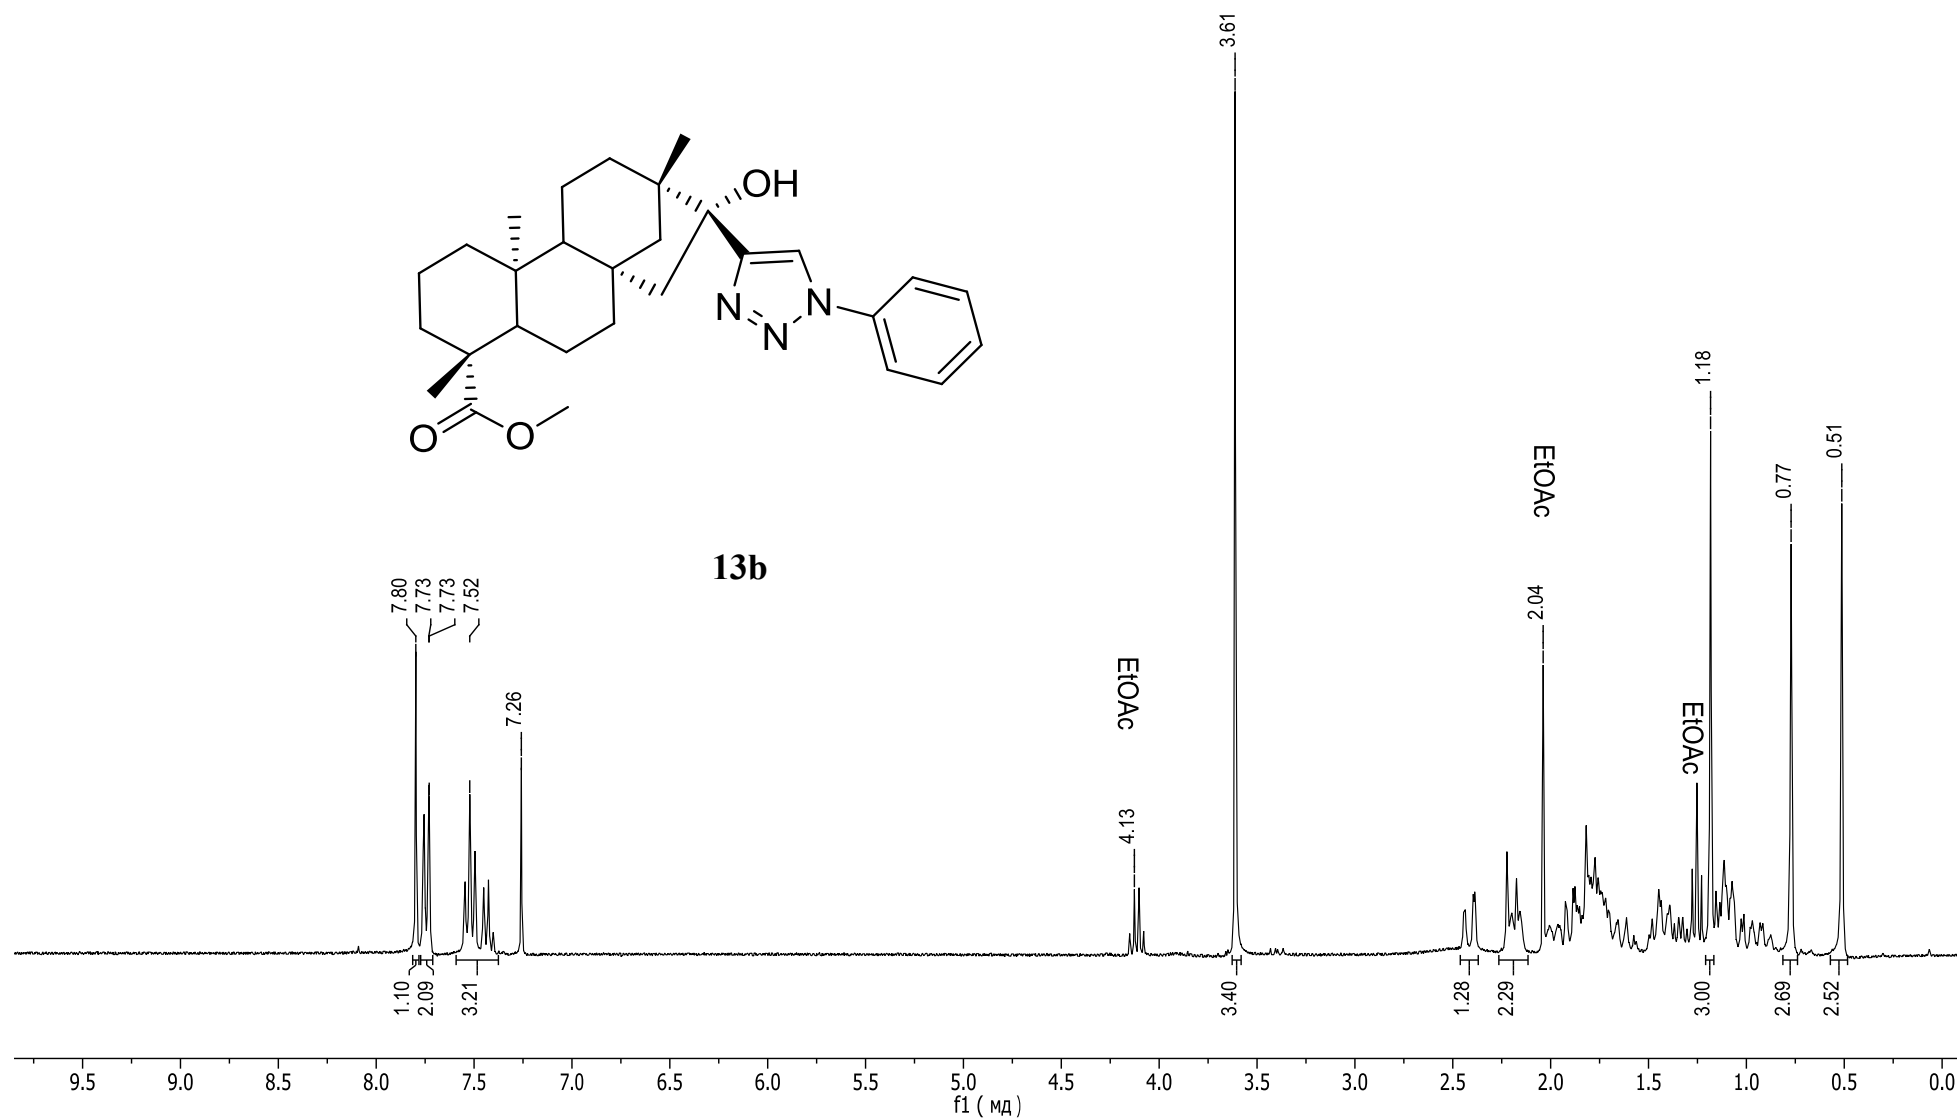



Figure S17.  $^{13}\text{C}$ -NMR of compound 13b.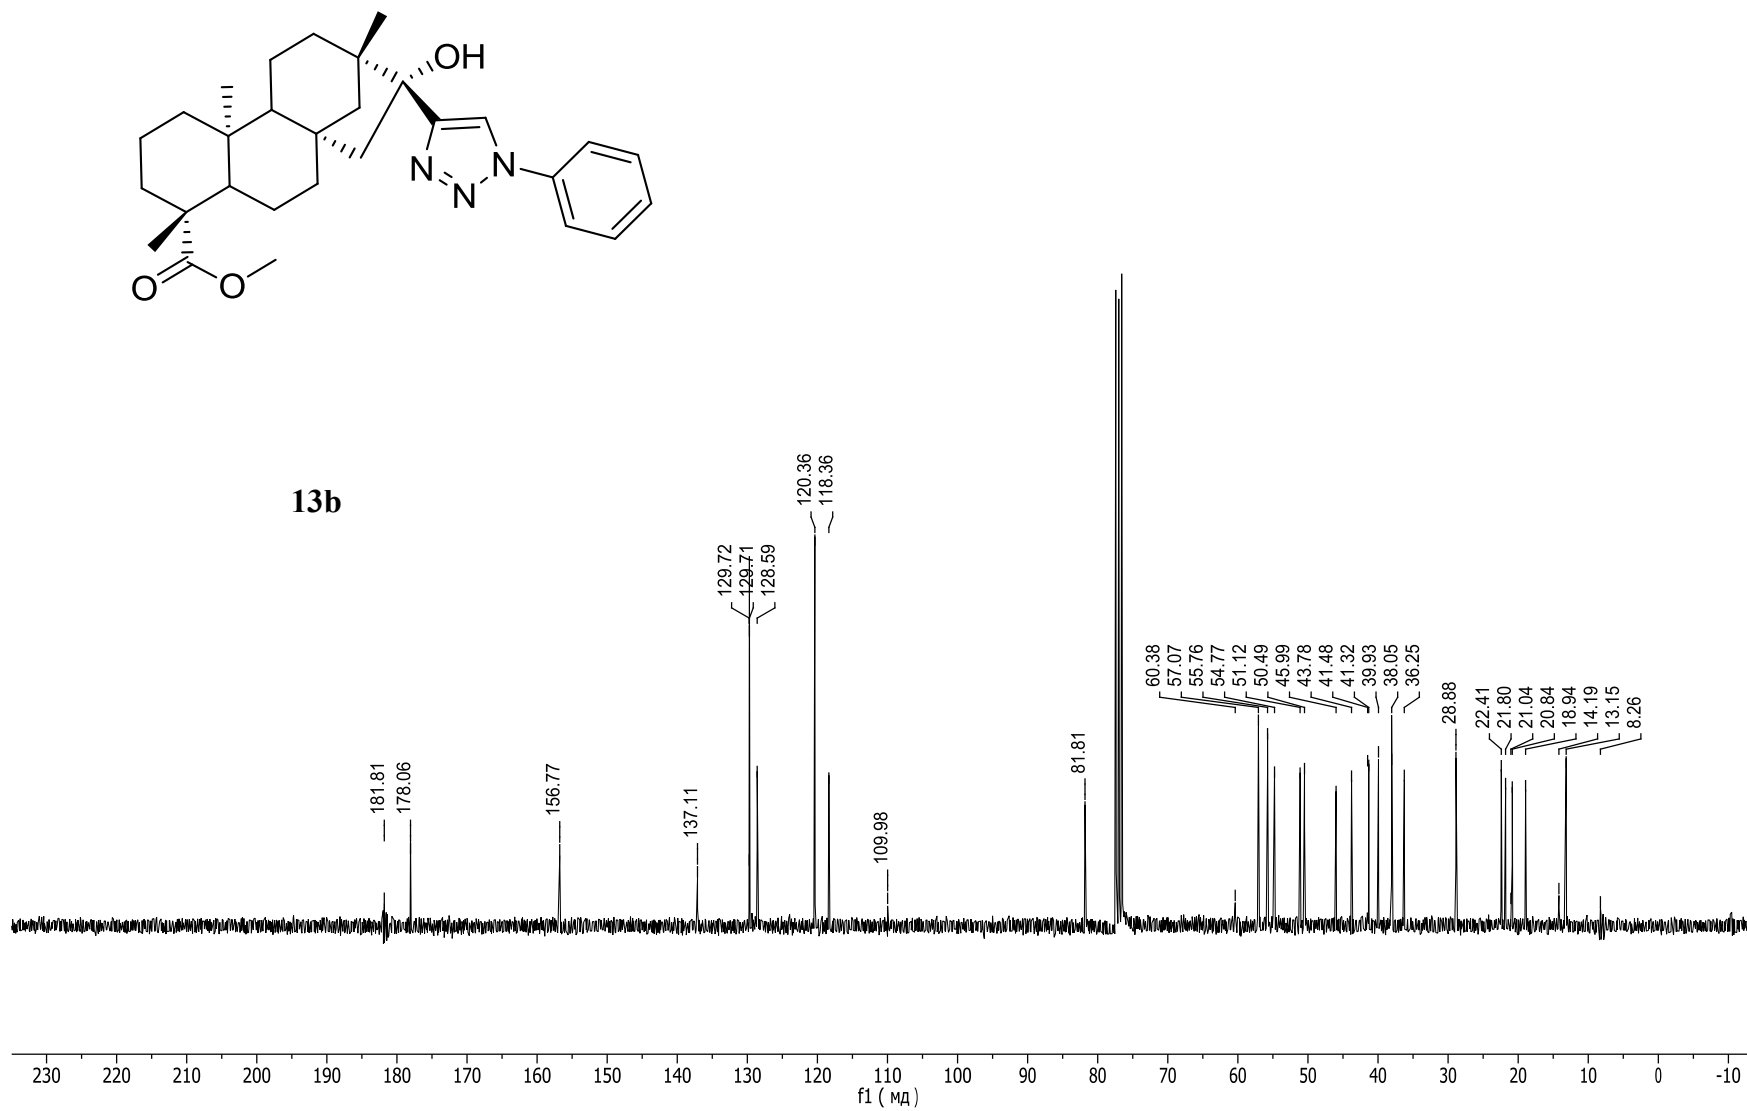

Figure S18. HRMS of compound 13b.

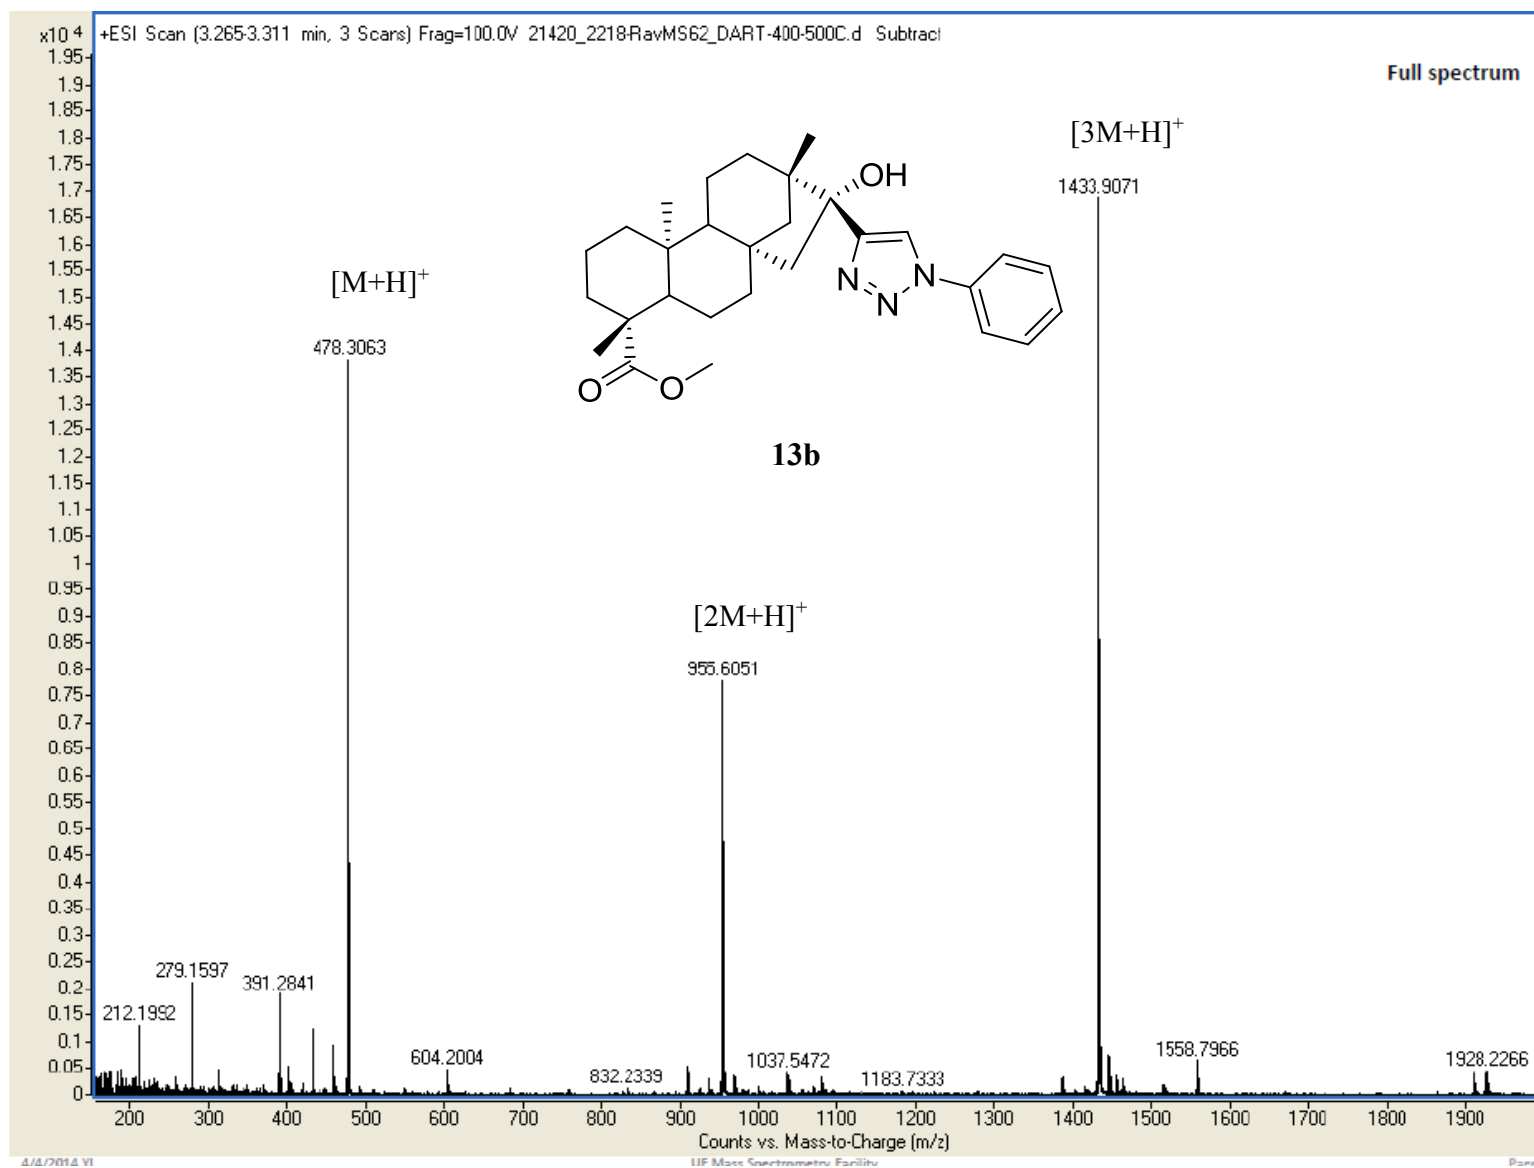

Figure S19.  $^1\text{H-NMR}$  of compound **13c**.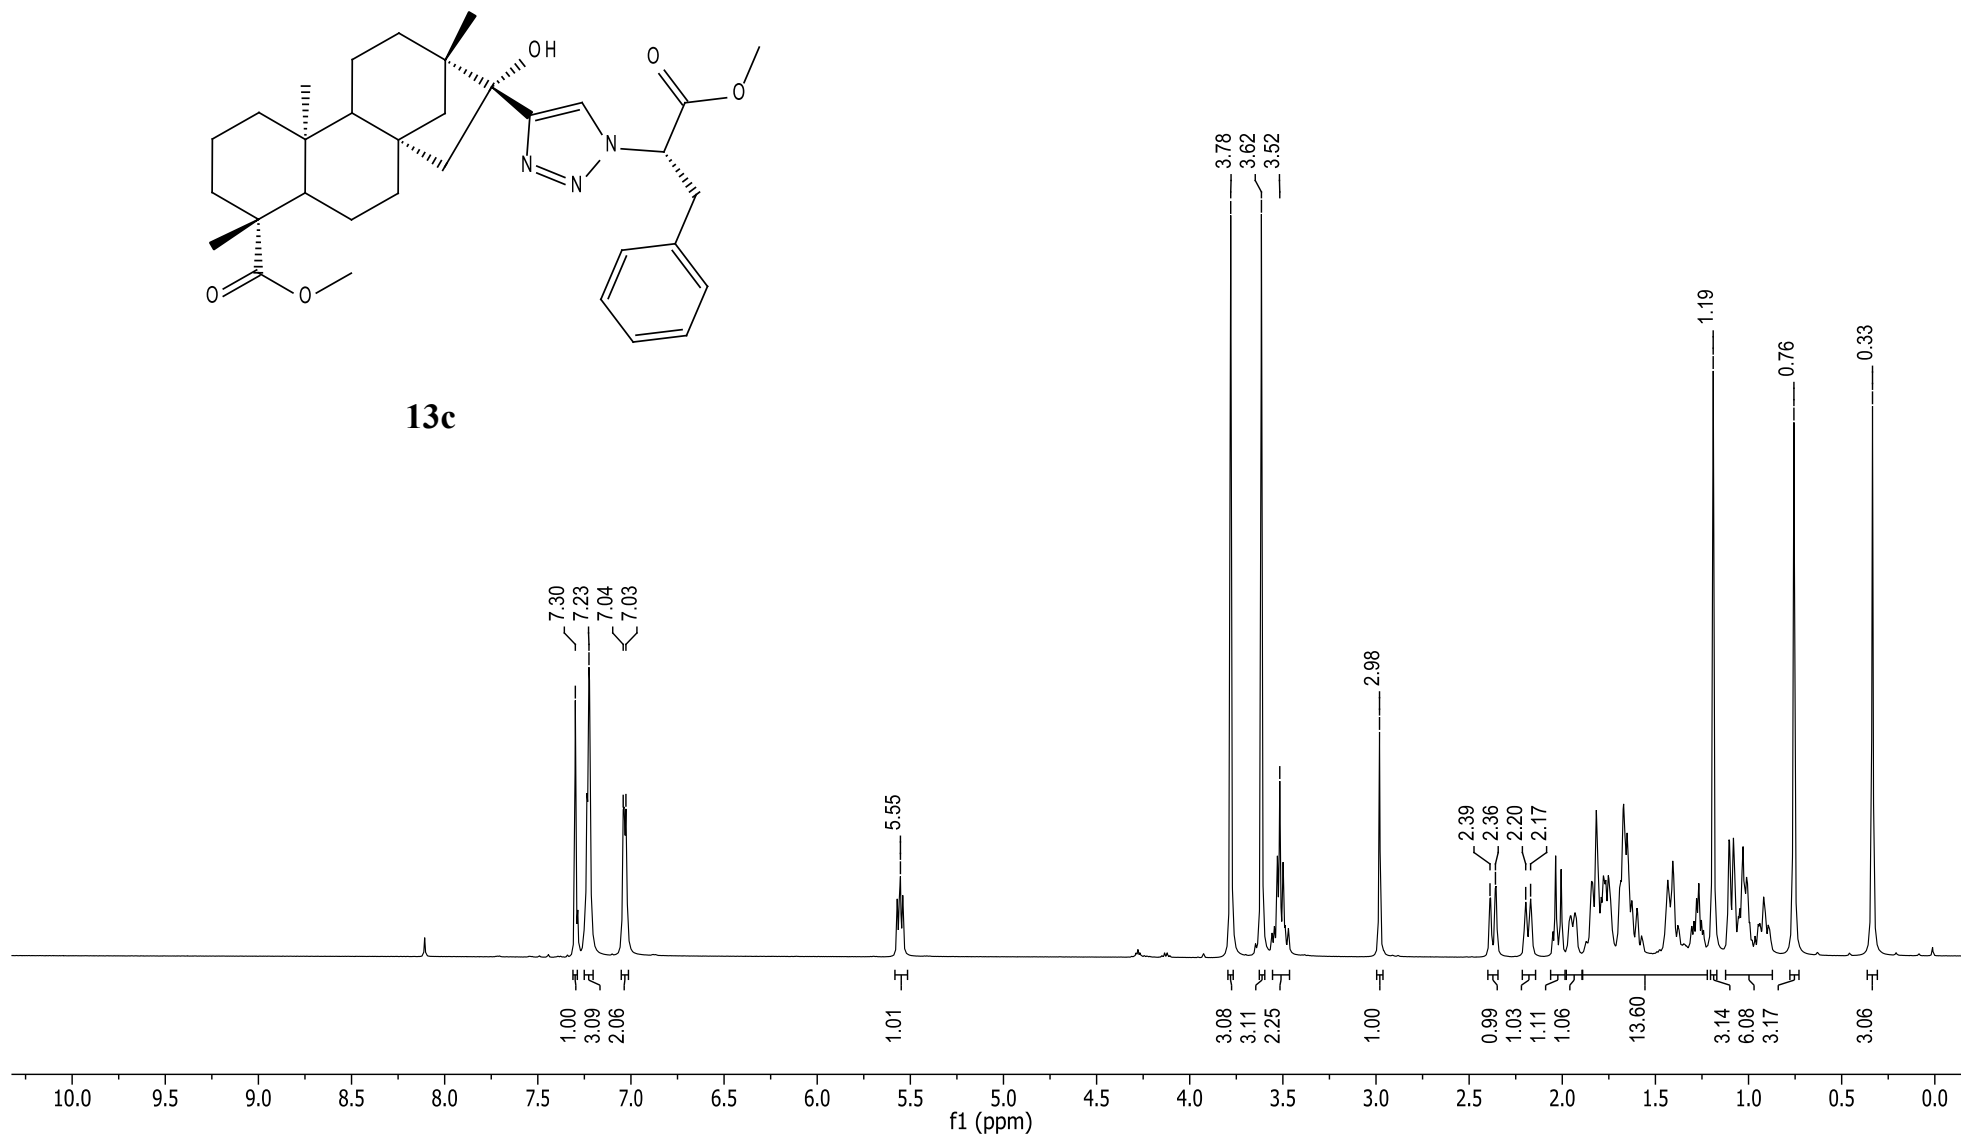

Figure S20.  $^{13}\text{C}$ -NMR of compound 13c.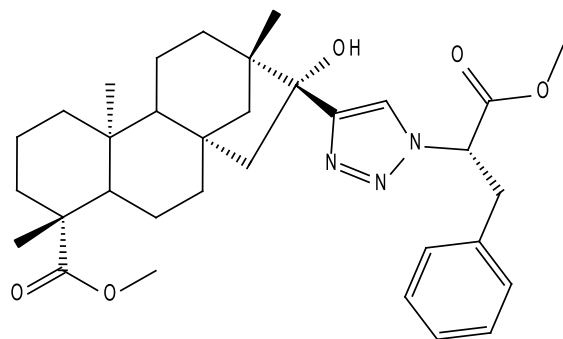

13c

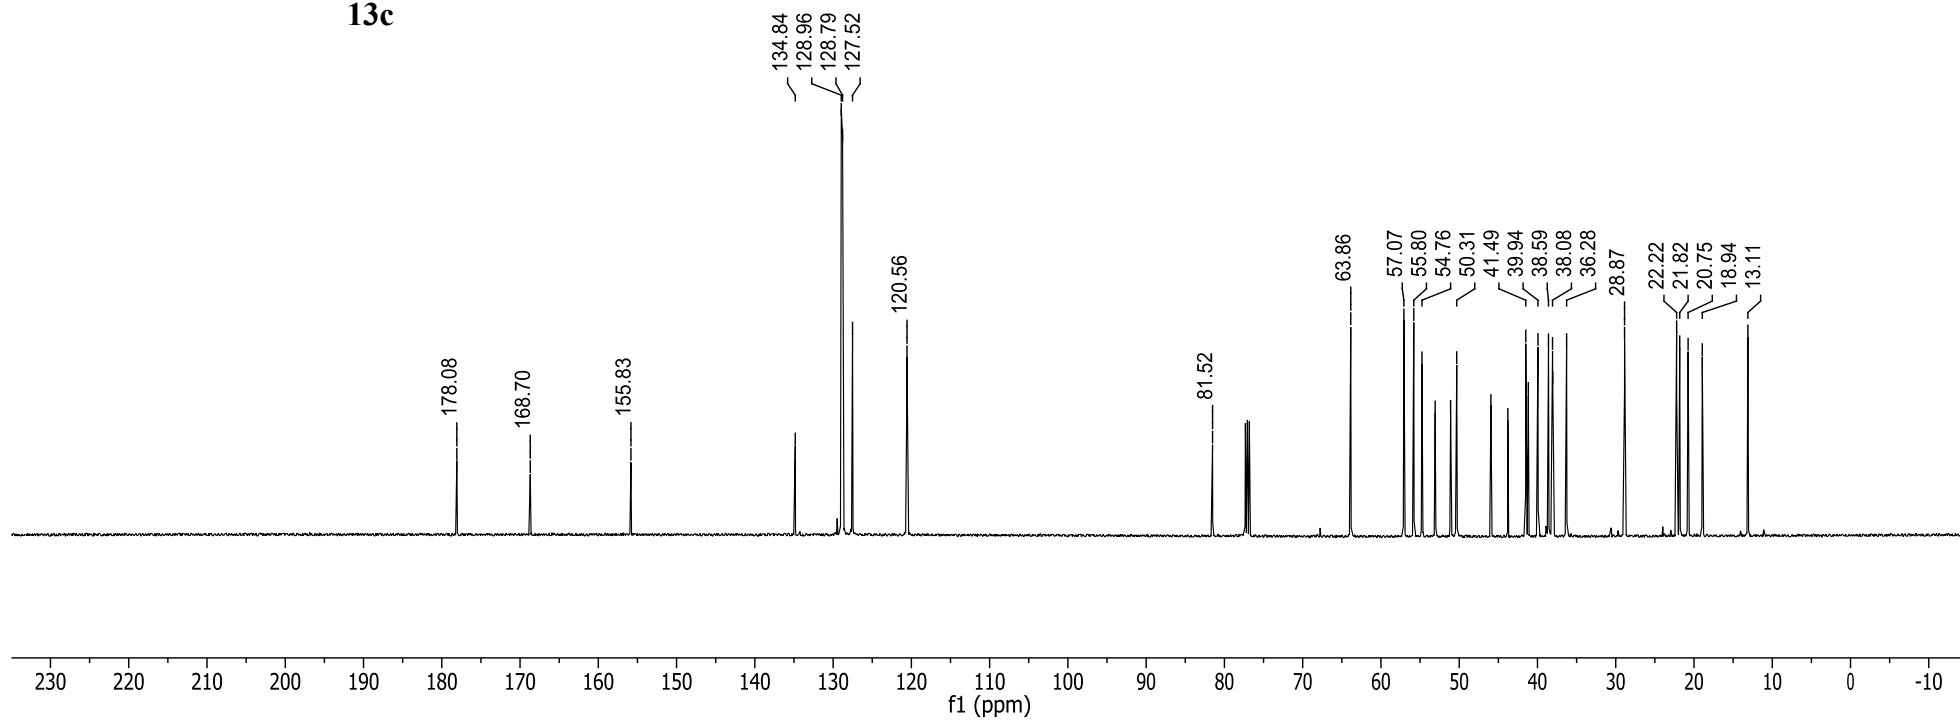

Figure S21. HRMS of compound 13c.

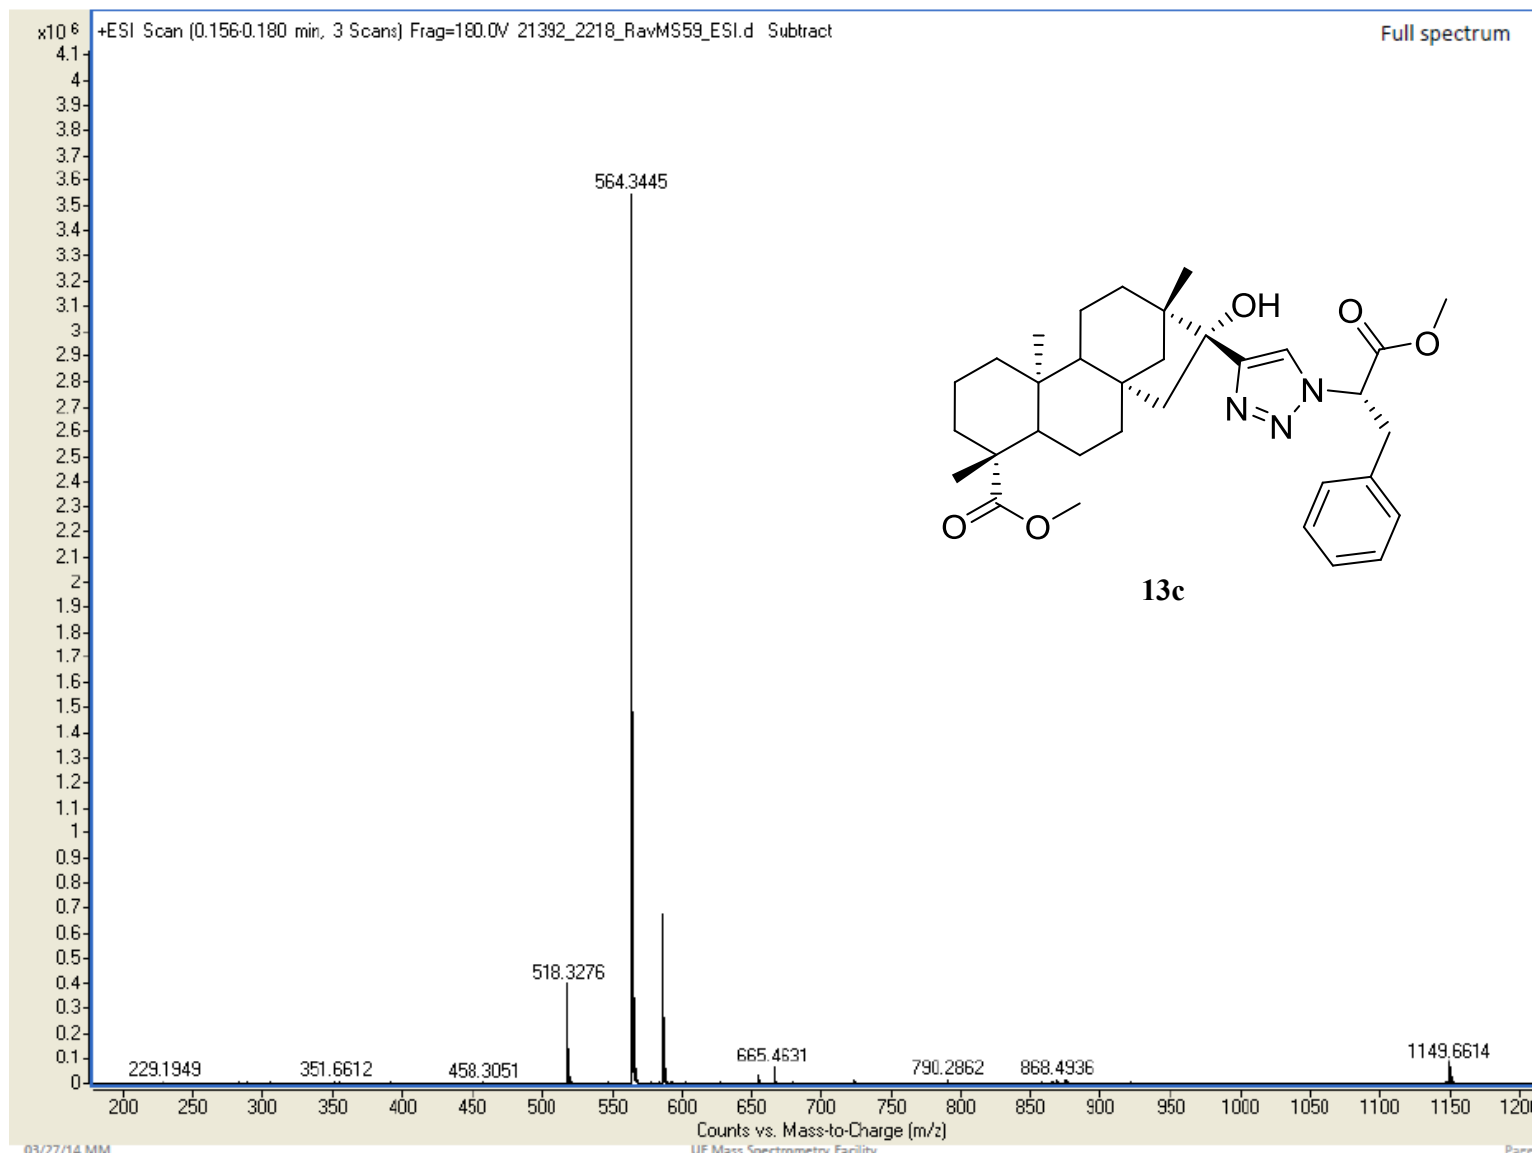

Figure S22.  $^1\text{H-NMR}$  of compound 13d.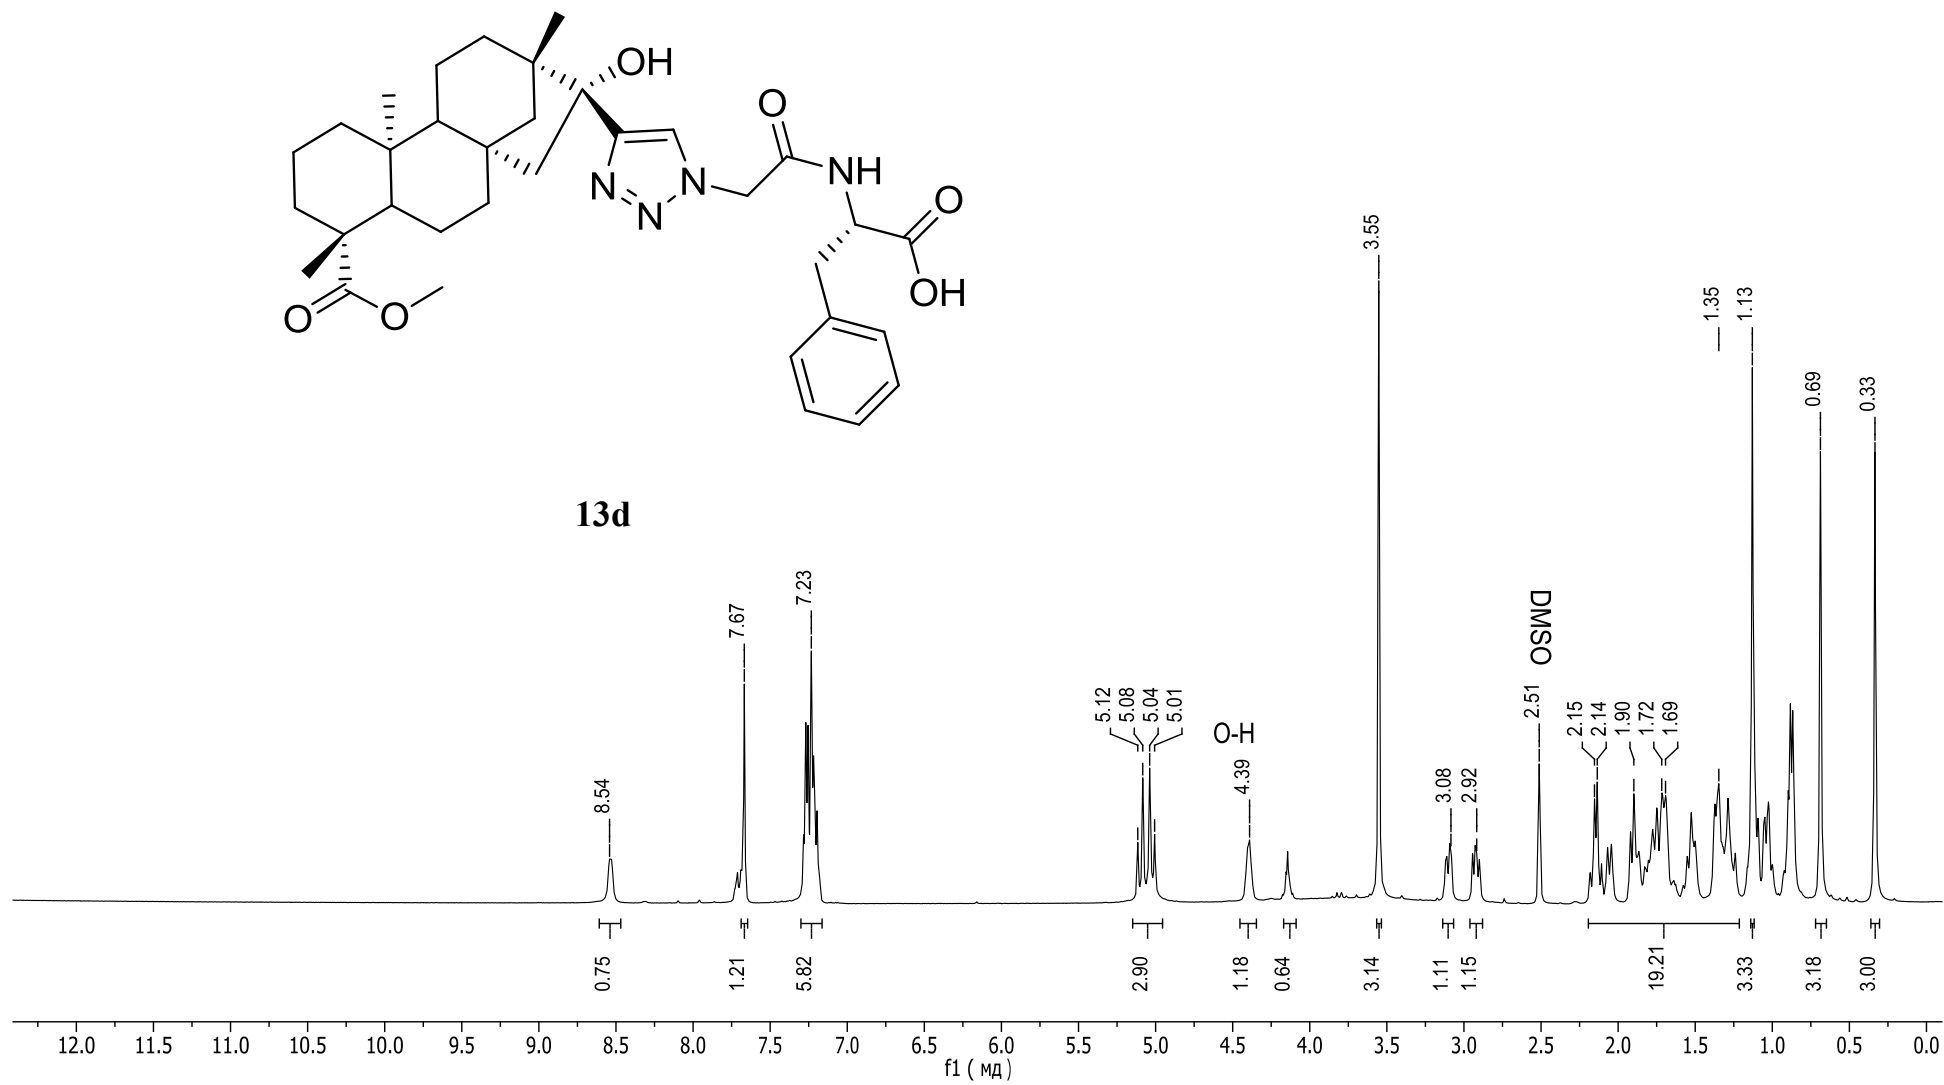

Figure S23.  $^{13}\text{C}$ -NMR of compound 13d.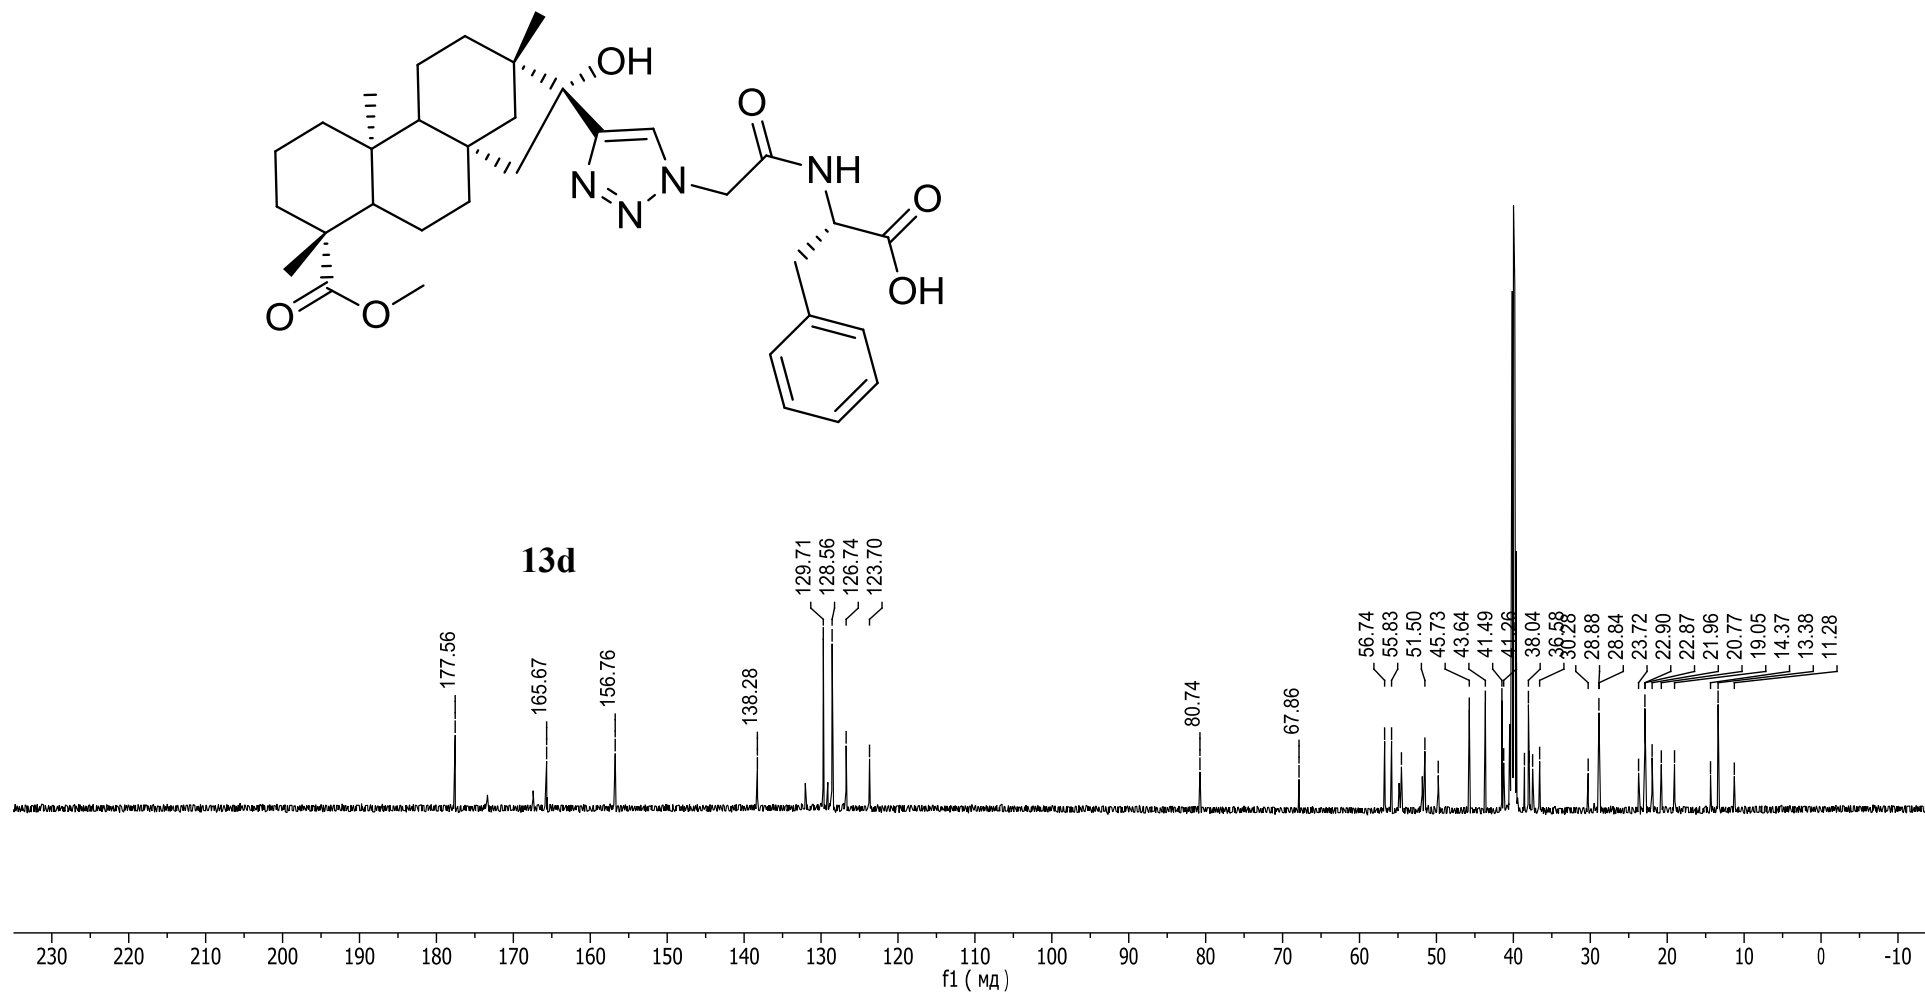

Figure S24. HRMS of compound 13d.

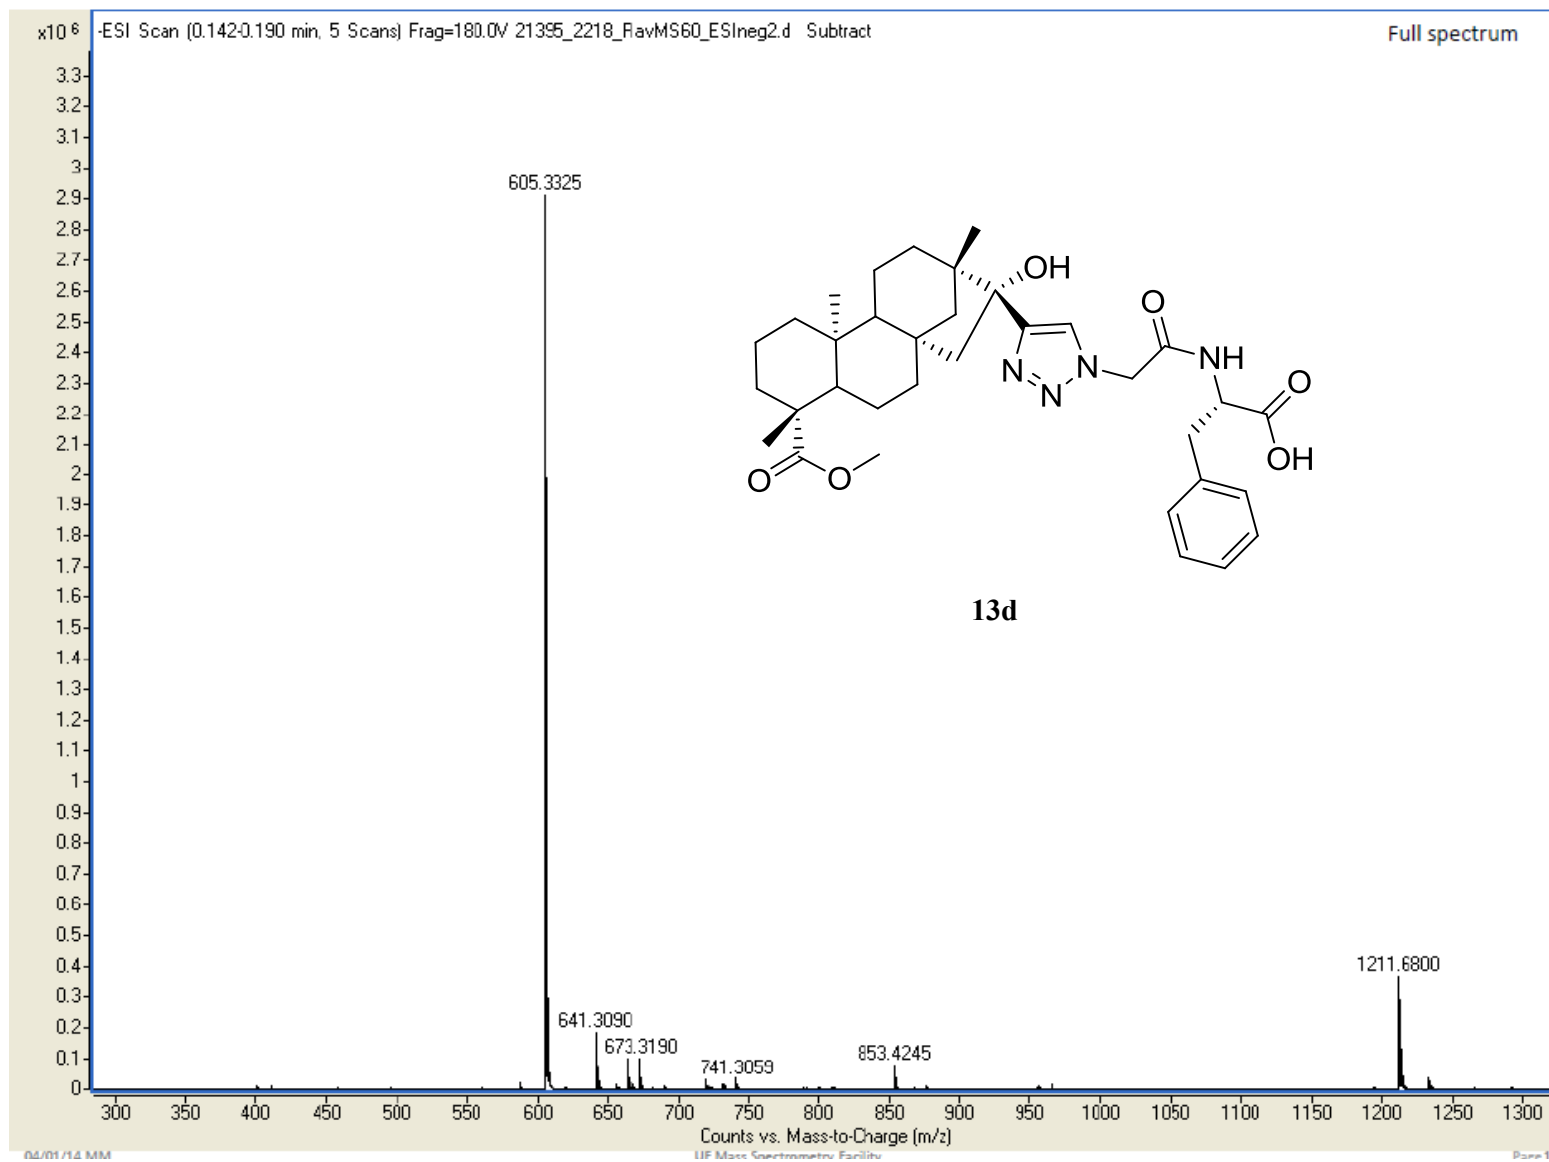

Supplement: molecules-19-18676-s001.pdf [file molecules-19-18676-s001.pdf]
